# Supplementary material for: Density functional theory (DFT) calculations of VI/V reduction potentials of uranyl coordination complexes in non-aqueous solutions
Source: Royal Society of Chemistry journal article supplement (doi:10.1039/c8cp05412f), 2019-01-01
Supplement: c8cp05412f1.pdf [file c8cp05412f1.pdf]

# Density Functional Theory (DFT) Calculations of VI/V Reduction Potentials of Uranyl Coordination Complexes in Non-aqueous Solutions

Krishnamoorthy Arumugam\*<sup>1,2</sup> and Neil A. Burton<sup>1</sup>

<sup>1</sup>School of Chemistry, Brunswick Street, The University of Manchester, Manchester, UK, M13 9PL (UK)

<sup>2</sup>Current address: National Post Doctoral Fellow, Simulation Center for Atomic and Nanoscale MATerials (SCANMAT), Central University of Tamil Nadu, Thiruvarur, Tamil Nadu 610101, India.

Email: krish.odc@gmail.com

Phone: 00 91 97861 38099

## Electronic Supplementary Information

### 1. Computational details

This section provides details about density functional theory (DFT) methods, basis sets and solvation method used to investigate the reduction free energies (RFEs) of uranyl complexes. The U-atom has been described by using a small-core effective-core potential (SC-ECP) (Stuttgart-Dresden-Dolg-SDD), which contains 60 core electrons, combined with a segmented contracted Gaussian basis set to describe the valence electrons<sup>1,2,3</sup> such as  $5s^25p^65d^{10}6s^26p^65f^66d^17s^2$ . The non-metal C, O, N, S and H atoms have been described by using a 6-31G\* basis set. This combination of basis sets is denoted as the B1 basis. The SC-ECP, on U and the 6-311+G\*\* basis set on all the other atoms is collectively denoted as the B2 basis. The DFT functionals used in this study are the hybrid, B3LYP<sup>4,5,6,7</sup> and M06<sup>8</sup> functionals. The model complexes have been optimised in the gas-phase at the B3LYP/B1 level of theory and confirmed to be minima on the potential energy surface by calculations of their frequencies at the same level of theory. Single point energies were then calculated using the B2 basis with a Conductor-like Polarizable Continuum model (CPCM)<sup>9,10</sup> for description of bulk solvent at the B3LYP/B1 geometries. The level of theory here is referred to as the B3LYP/B2(CPCM)//B3LYP/B1 level. Moreover, the M06 functional has been used for single point energy calculations at the B3LYP/B1 geometries with the CPCM solvation model employing the B2 basis and this level of theory is referred to as the M06/B2(CPCM)//B3LYP/B1 level. In the CPCM model, the solute cavities have been described by using the United-Atom Kohn-Sham (UAKS) cavity, which has been used to predict accurate aqueous solvation free energies of a range of solutes within ~0.11 eV of experiment<sup>11</sup> and accurate RFEs of various actinyl complexes and redox-active mineral bound actinyl aqua complexes in aqueous solution<sup>12,13</sup>. The solvents used in this study and their dielectric constants ( $\epsilon$ ) are:

- Dimethylsulfoxide (DMSO) ( $\epsilon= 46.826$ )
- Dimethylformamide (DMF) ( $\epsilon= 37.219$ )
- Dichloromethane (DCM) ( $\epsilon= 8.93$ )
- Acetonitrile (ACN) ( $\epsilon=35.688$ )
- Pyridine (Py) ( $\epsilon=12.978$ )

The free energy and Zero-point energy (ZPE) corrections obtained from the B3LYP/B1 frequency calculations have been added to the solvation energies obtained using the B2 basis. The systems with unpaired electrons have been treated with the un-restricted formalism thorough-out this study. Spin-orbit coupling effects were not considered explicitly; however, the RFE values have been corrected with a spin-orbit coupling correction,  $-0.31\text{eV}$ , for the penta-valent uranyl(V) ion as determined by Hay *et al.*<sup>14</sup>.

All the calculations were carried out using the Gaussian 03<sup>15</sup> except the solvation calculations for the solvent pyridine, which were carried out with the Gaussian 09 package<sup>16</sup>. There are no solvent parameters available for DMF in G03; hence, the required parameters such as  $\epsilon=36.71$ , radius of the solvent =  $2.647\text{\AA}$ , density =  $0.007780$  and  $\epsilon$  (infinity) =  $1.75$  have been specified using the ‘Solvent’ keyword. Construction of the uranyl model complexes and visualisation of results have been carried out with the Gauss View and Molden<sup>17</sup> software packages.

## 1.1. Classical Molecular dynamics of uranyl ion in DMSO

Classical molecular dynamics (MD) simulations were carried out to find the uranyl(VI) local coordination environment of DMSO molecules in the equatorial plane.. Classical MD simulations of the uranyl(VI) ion in a solvent box of DMSO have been carried out using the AMBER 10 molecular dynamics package<sup>18</sup>. The  $[\text{UO}_2]^{2+}$  parameters<sup>19</sup> and DMSO solvent parameters<sup>20</sup> were obtained from the literature and pre-equilibrated DMSO solvent box was obtained from the Bryce’s online amber parameter database<sup>21</sup>.

A rectangular DMSO solvent box of size  $20\text{\AA}$  was used for the simulation of the  $[\text{UO}_2]^{2+}$  ion. The total number of DMSO molecules present was 531. Minimizations of  $[\text{UO}_2]^{2+}$  in this DMSO box were carried out up to 9000 steps without any restraint on the uranyl ion. The systems were then heated up to 300 K using the Langevin dynamics with a collision frequency  $\gamma$  of  $0.2\text{ ps}^{-1}$  for about 100 ps with a constant volume and a time step of 1 fs was used. Then the equilibrations of the system with a constant pressure of 1 bar for about 100 ps were performed and these were then followed by a final 1 ns production MD simulation. A non-bonded Ewald cut-off of  $15\text{\AA}$  was used throughout these simulations. The coordinates were written to the ‘mdcrd’ file for every 0.1 ps and then these were used for the construction of the radial distribution function (RDF) of the U- $\text{O}_{\text{DMSO}}$  distances.

## 1.2. Reduction Free Energy prediction

With the help of a thermodynamic cycle, reduction free energies (RFE) in the gas and solution phase can be obtained. The thermodynamic cycle used for the determination of RFEs of oxidised and reduced uranyl complexes in the gas and solution phase are shown in Scheme. 1.

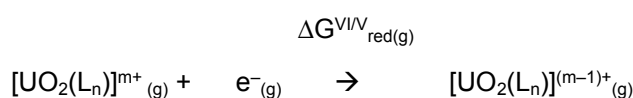

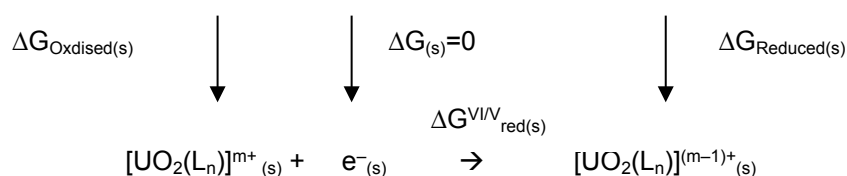

**Scheme 1.** Thermodynamic cycle used for the RFE prediction of oxidised and reduced uranyl complexes in the gas and solution phase.

The predicted RFEs of the overall reduction process in solution are then referenced with respect to standard reference electrode free energies and directly compared with the available experimental RFEs. Two methods such as direct and isodesmic reaction methods are proposed for the determination of RFEs.

### 1.2.1 Direct method

The standard hydrogen electron (SHE) is used as the reference electrode for aqueous solution. For the non-aqueous solutions, the Fc/Fc<sup>+</sup> redox couple (eqn. 1) is widely employed as a reference electrode. The redox equation are provided below

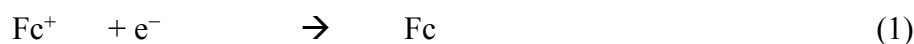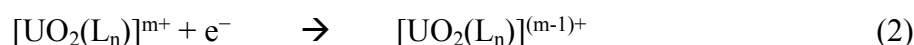

When the two redox equations (eqn. 1 and 2) are combined together, an overall redox equation is obtained (eqn.3); the RFE of the redox reaction (eqn.3) is computed using the thermodynamic cycle as discussed earlier (see Scheme. 1).

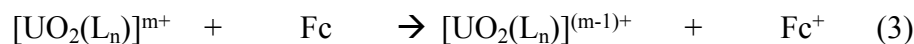

The following equations are used to determine the RFEs for VI/V reduction of uranyl complexes in non-aqueous solution.

$$\Delta G_{\text{red(s)}^{\text{VI/V}}} = \Delta G_{\text{red(g)}^{\text{VI/V}}} + \Delta \Delta G_{\text{solv}} \quad (4)$$

$$\Delta \Delta G_{\text{solv}} = \Delta G_{\text{Reduced(s)}} - \Delta G_{\text{Oxidised(s)}} \quad (5)$$

$$\Delta G_{\text{red}} = \Delta G_{\text{red(s)}^{\text{VI/V}}} - \Delta G_{\text{red}}^{\text{ref.electrode}} \quad (6)$$

where  $\Delta G_{\text{red(g)}^{\text{VI/V}}}$  is the RFE of uranyl complexes in the gas-phase;  $\Delta G_{\text{Oxidised(s)}}$  and  $\Delta G_{\text{Reduced(s)}}$  are the solvation free energies of oxidised and reduced complexes, respectively;  $\Delta \Delta G_{\text{solv}}$  is the difference between the solvation free energy of reduced and oxidised complexes ( $\Delta G_{\text{Reduced(s)}} - \Delta G_{\text{Oxidised(s)}}$ ). The absolute RFE for the uranyl(VI) to V reduction process,  $\Delta G_{\text{red(s)}^{\text{VI/V}}}$  was determined by using the equation (4), then the equation (6) was utilized to obtain the RFE ( $\Delta G_{\text{red}}$ ) with respect to a reference electrode;  $\Delta G_{\text{red}}^{\text{ref.electrode}}$  is the free energy of a reference electrode. The reference electrode for non-aqueous solutions is the Fc/Fc<sup>+</sup> electrode as recommended by the International Union of Pure and Applied Chemistry (IUPAC)<sup>22</sup>.

### 1.2.2. Isodesmic models

Isodesmic reaction method is an alternative one and used to determine the RFEs of uranyl complexes in non-aqueous solutions. An example of isodesmic reaction is given below (see eqn. 7).

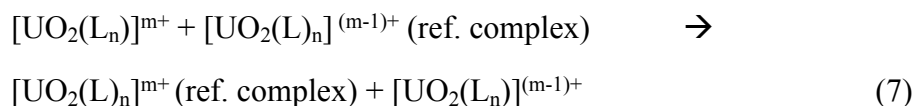

$$\Delta G_{\text{red}} = \Delta G_{\text{red(s)}}^{\text{VI/V}} + \Delta G_{\text{red}}^{\text{ref.complex}} \quad (8)$$

In the equation 8, the  $\Delta G_{\text{red}}^{\text{ref.complex}}$  term represents the experimental RFE of the reference complex. The selection of a reference complex for the RFE determination under isodesmic reaction scheme and its consequences are discussed later. When two or more reference complexes are considered for the RFE prediction, employing the isodesmic reaction method, only the reference complex giving small mean un-signed error (MUE) of the predicted RFEs with respect to the experimental RFE are provided.

The advantage of the isodesmic reaction method over the other methods is the cancellation of errors. Other direct methods require the computation of reference electrode potentials; this procedure often ends up giving an imprecision value for the standard reference electrode. The isodesmic reaction method has been previously used to predict the reduction potentials of transition metal complexes<sup>23,24</sup> to within 0.08 eV of the experimental values. The important thing in this method is choosing a reference system which must have similar electronic and chemical properties to the other systems under consideration. If the reference system is not properly chosen, then, it may introduce systematic errors into the determination of reduction potentials. The experiments should typically have determined the reduction potentials of the reference complex and the other complexes in the same solvent and electrolyte conditions.

## Figures

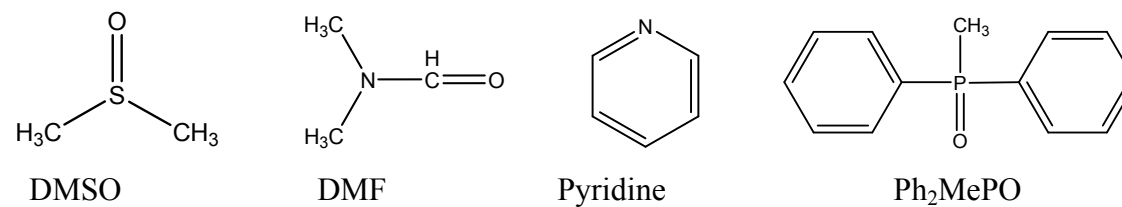

**Figure S1.** Mono-dentate ligand structures.

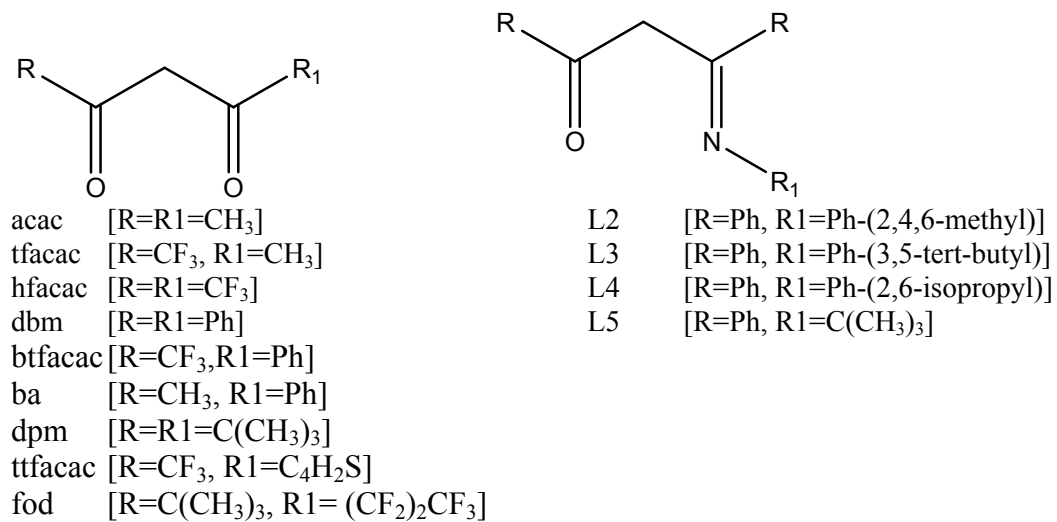

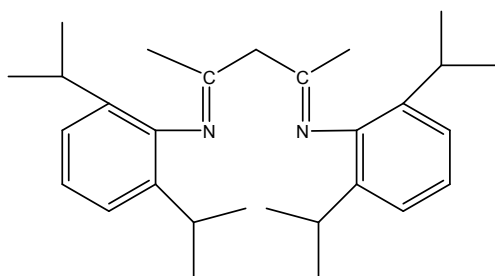

L1

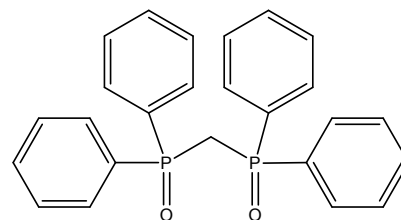

DPPMO<sub>2</sub>

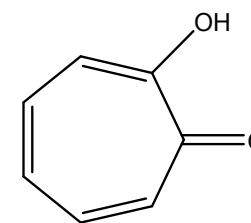

trop

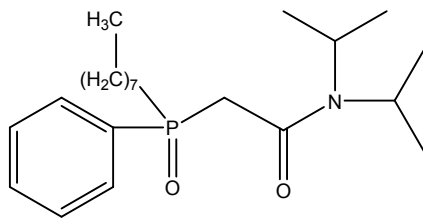

CMPO

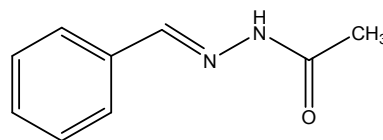

sldh

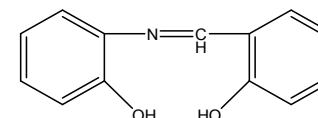

sap

**Figure S2.** Bi-dentate ligands and tri-dentate 'sap' ligand structures.

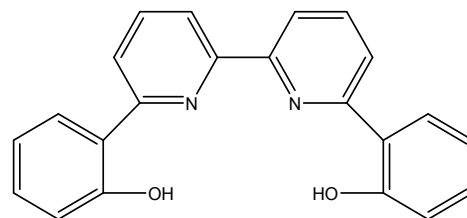

salbity

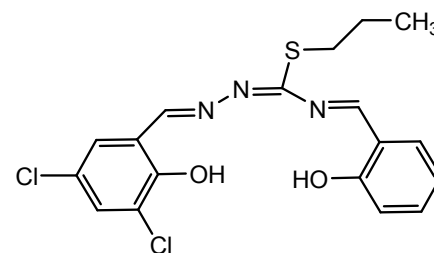

tsmc

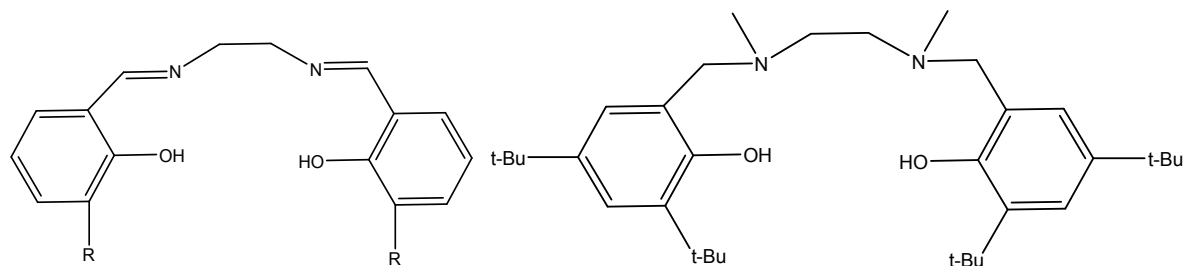

salen [R=H], salacen [R=COOH]

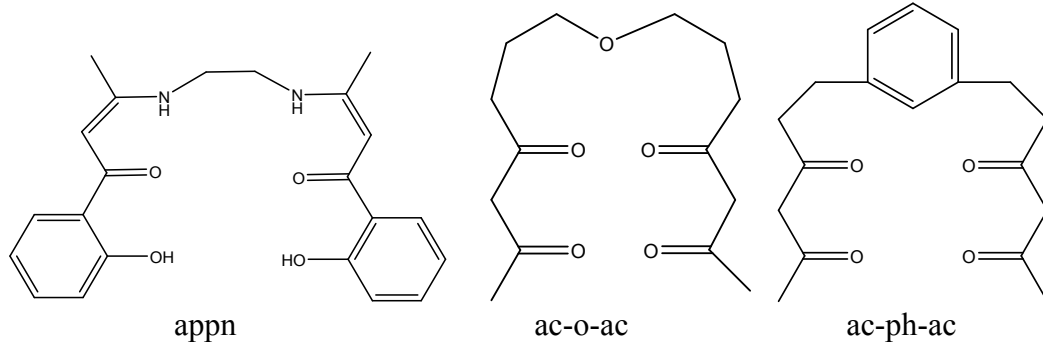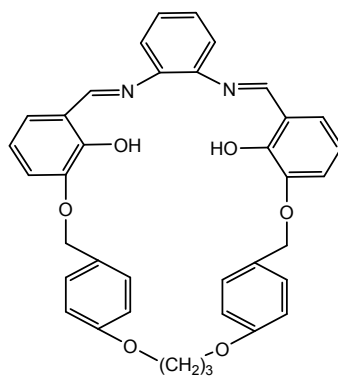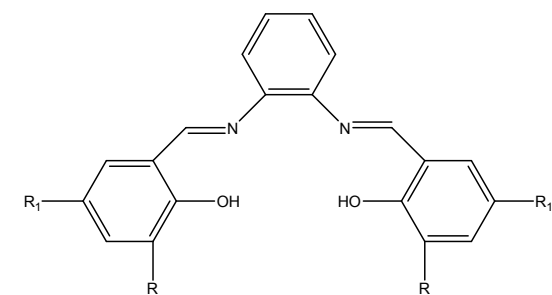

- saloph1 [R=R1=H]
- saloph3 [R=O(CH<sub>2</sub>)-Ph, R1=H]
- saloph4 [R=Ph, R1=H]
- saloph5 [R=Ph-(2-OCH<sub>3</sub>), R1=H]
- saloph-tbu [R=R1=C(CH<sub>3</sub>)<sub>3</sub>]

**Figure S3.** Tetra-dentate ligand structures.

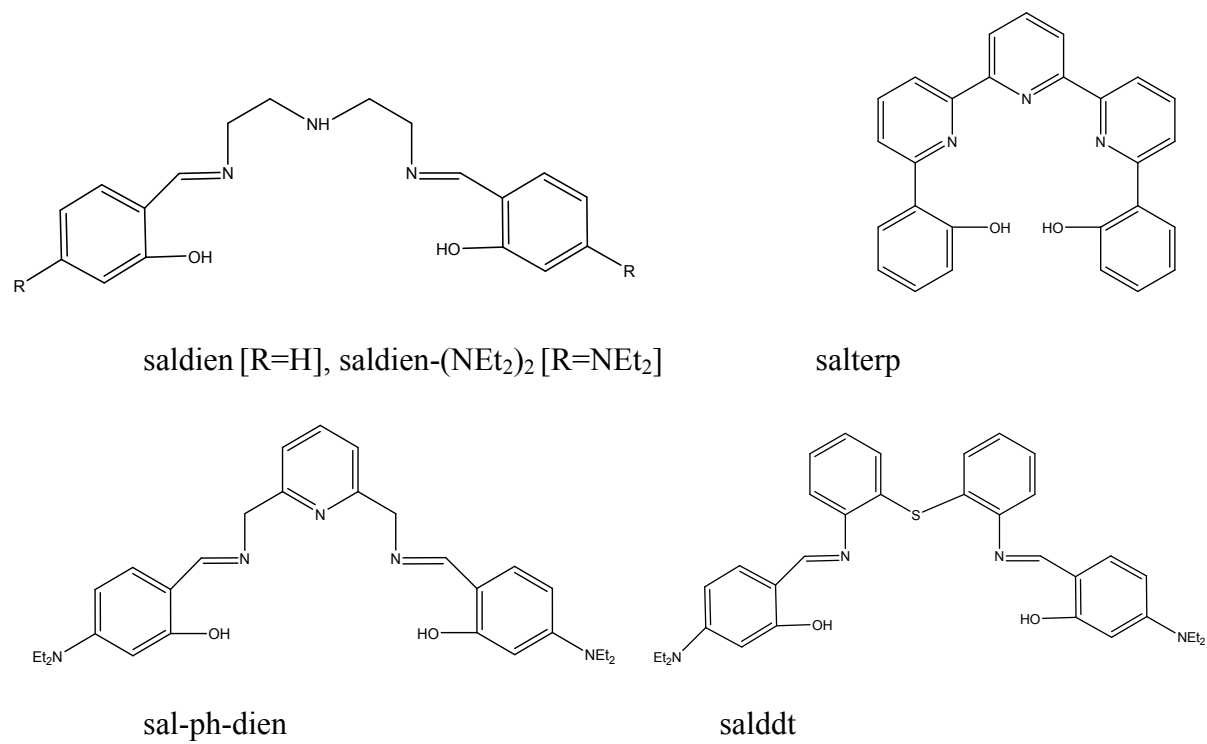

**Figure S4.** Penta-dentate ligand structures.



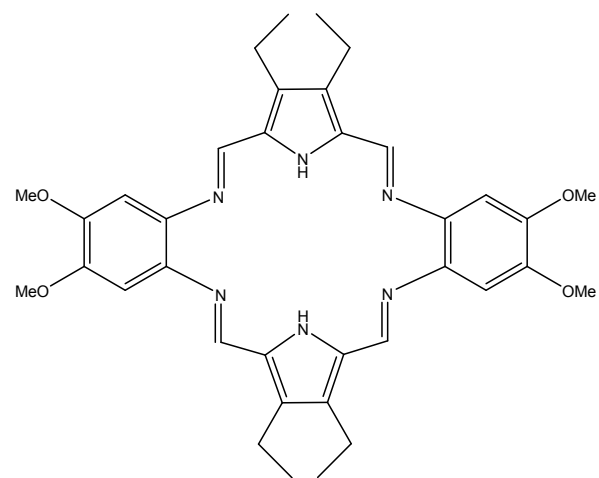

AP1

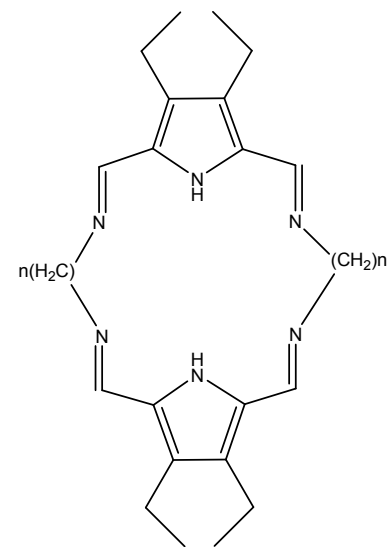

AP2 [n=2] and AP3 [n=3]

**Figure S5.** Hexa-dentate ligand structures.

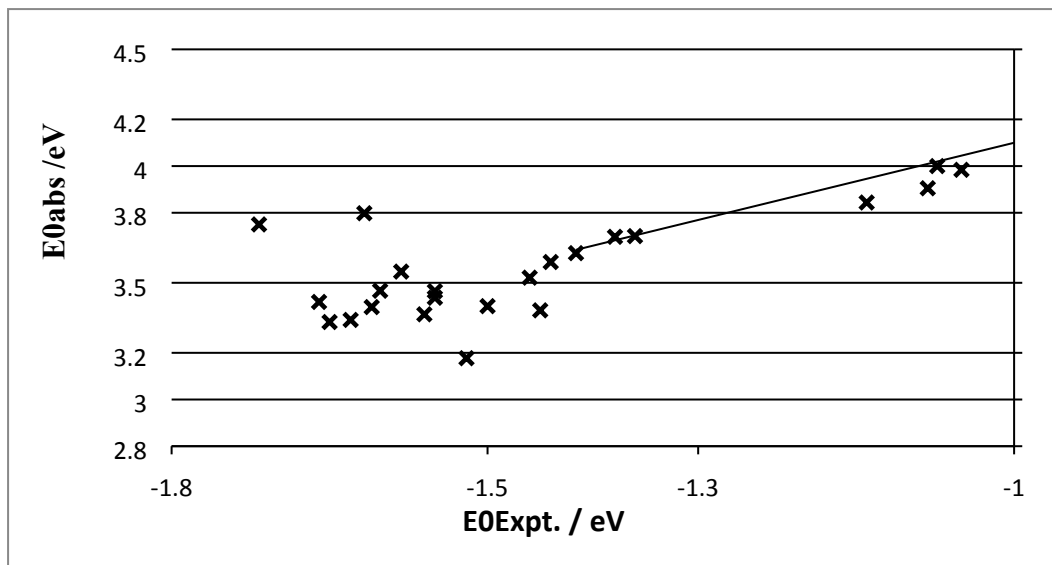

**Figure S6.** Absolute reduction potentials ( $E^0_{\text{abs}}$ ) of the uranyl complexes computationally estimated in DMSO solution are plotted against the experimental reduction potentials ( $E^0_{\text{Expt.}}$ ).

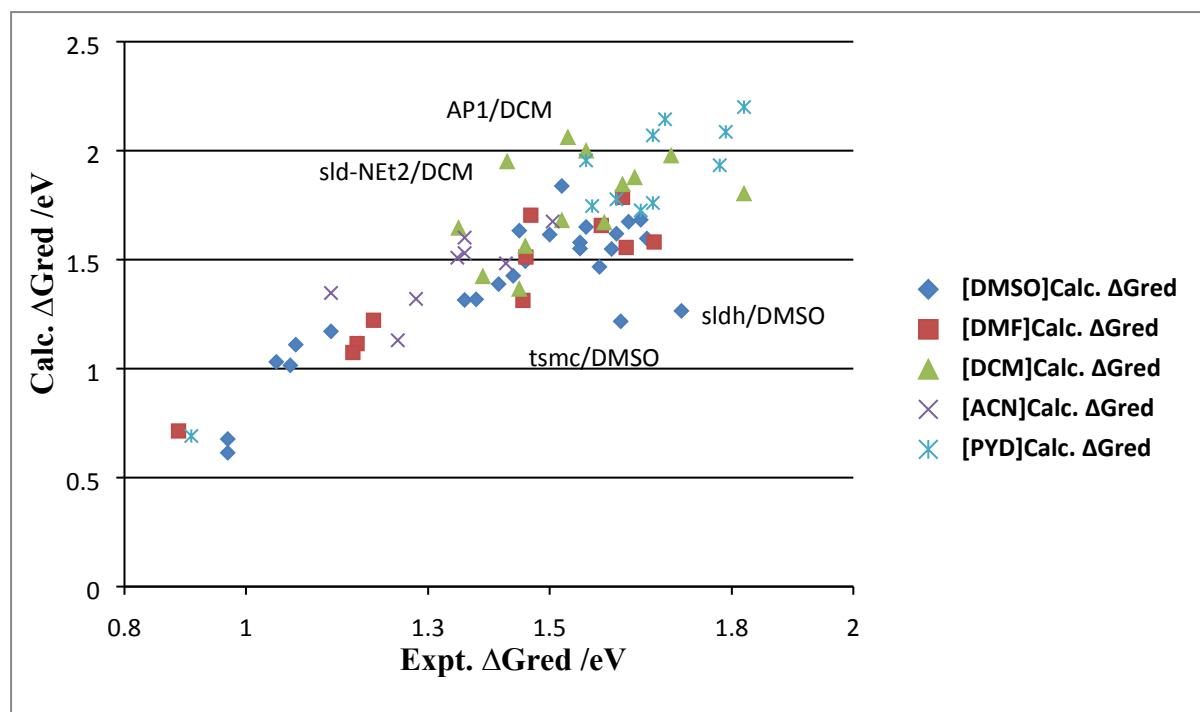

**Figure S7.** Plot of calculated uranyl(VI/V) REFs (Calc.  $\Delta G_{\text{red}}$  includes the correction of  $\text{Fc}/\text{Fc}^+$  ref. 0.60 eV) at the B3LYP/B2(CPCM/UAKS)//B3LYP/B1 level of theory against the experimental RFEs (Expt.  $\Delta G_{\text{red}}$ ).

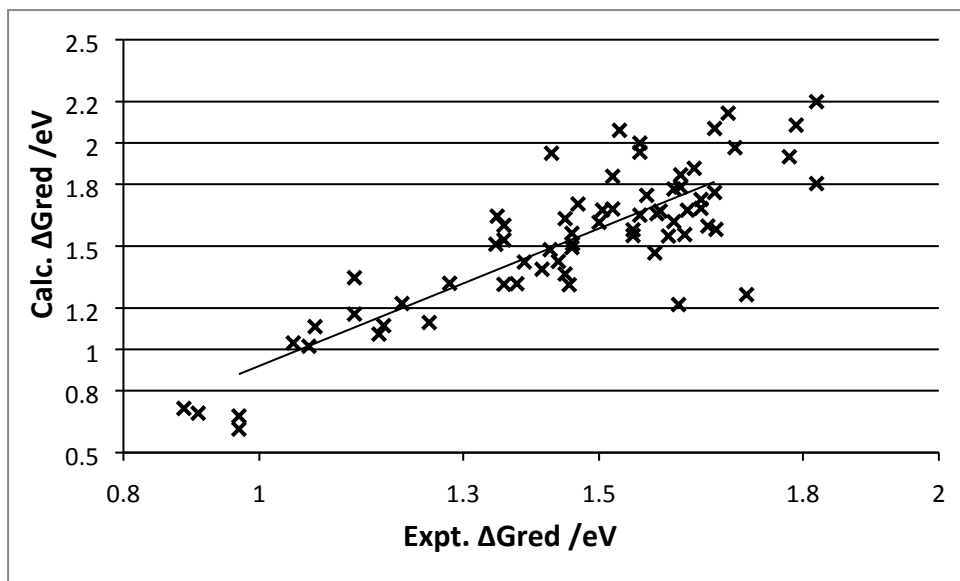

**Figure S8.** The plot of calculated uranyl(VI/V) REFs (Calc.  $\Delta G_{\text{red}}$  includes the correction of  $\text{Fc}/\text{Fc}^+$  ref. 0.60 eV) at the B3LYP/B2(CPCM/UAKS)//B3LYP/B1 level of theory against the experimental REFs (Expt.  $\Delta G_{\text{red}}$ ).

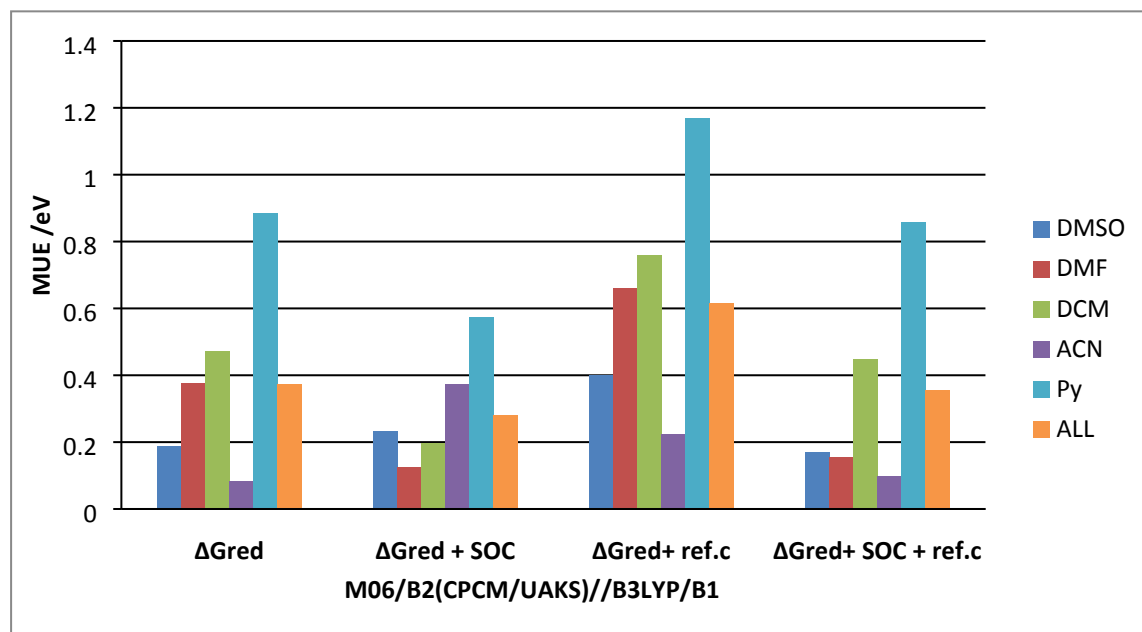

**Figure S9.** Mean unsigned errors (MUEs) for the predicted reduction free energies (RFEs) of investigated uranyl complexes at the M06/B2(CPCM/UAKS)//B3LYP/B1 level of theory.

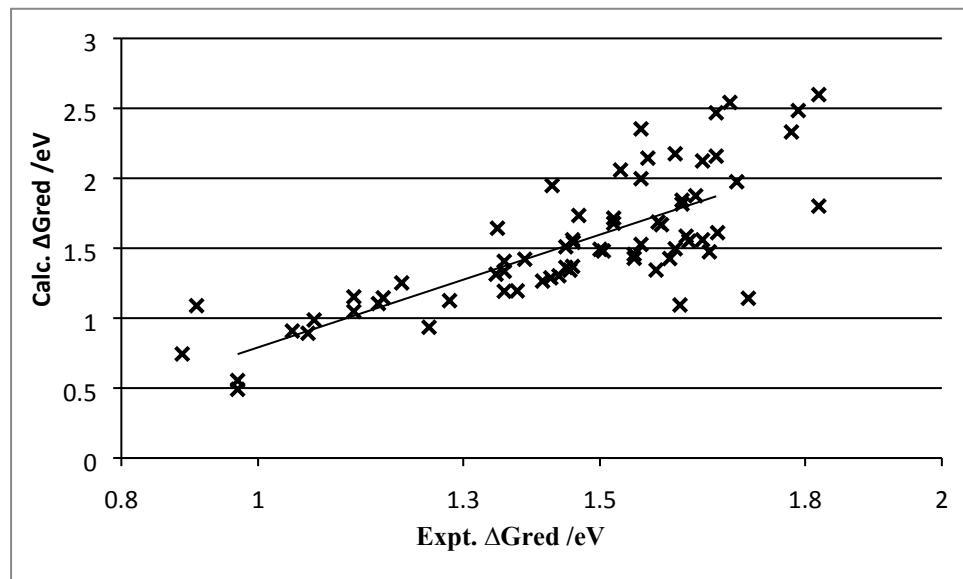

**Figure S10.** Plot of calculated uranyl(VI/V) RFEs (Calc.  $\Delta G_{red}$  are predicted using empirically estimated Fc/Fc<sup>+</sup> couples) against the experimental RFEs (Expt.  $\Delta G_{red}$ ) at the B3LYP/B2(CPCM/UAKS)//B3LYP/B1 level of theory.

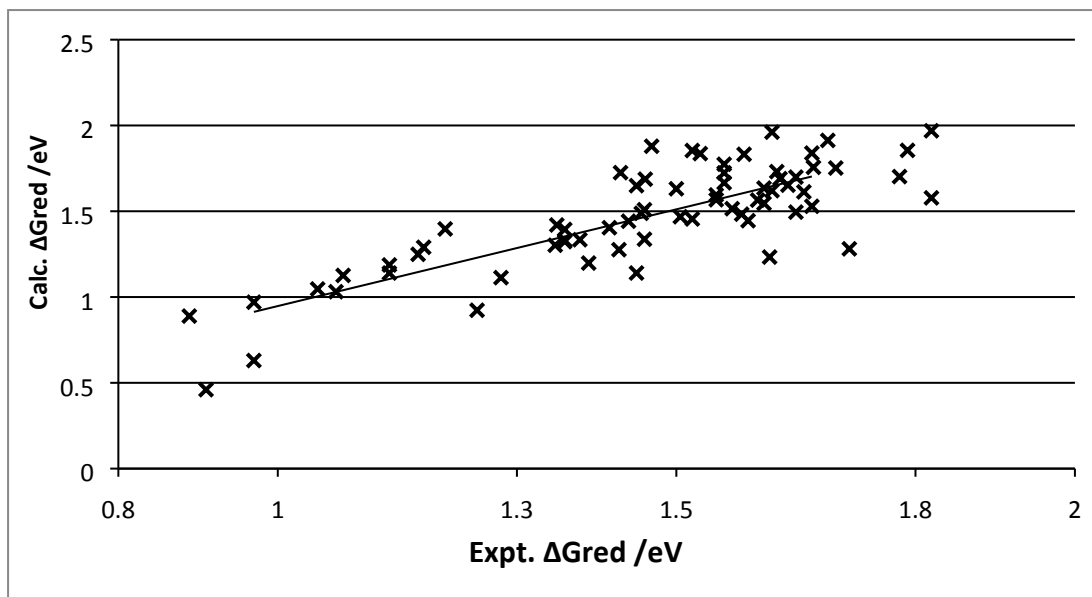

**Figure S11.** Plot of calculated uranyl(VI/V) REFs (Isodesmic model reference complexes:  $[\text{UO}_2\text{-(DMSO)}_5\cdot 7\text{DMSO}]^{2+/+}$ ,  $[\text{UO}_2\text{-(DMF)}_5]^{2+/+}$ ,  $[\text{UO}_2\text{-salddt-NEt}_2]^{0/-}$ ,  $[\text{UO}_2\text{-(L4+DP)}]^{1+/0}$  and  $[\text{UO}_2\text{-(PY)}_5]^{2+/+}$  (-0.46 eV)) against the experimental REFs (Expt.  $\Delta G_{\text{red}}$ ).

## Tables

**Table S1.** Experimental uranyl(VI/V) reduction free energies (RFEs) of uranyl complexes reported in various non-aqueous solution (eV).

| Sl. No. | Uranyl complexes                                      | $[\Delta G_{\text{red}}]$ | Reference            |
|---------|-------------------------------------------------------|---------------------------|----------------------|
|         | <b>DMSO</b>                                           |                           |                      |
| 1       | $[\text{UO}_2\text{-(DMSO)}_5]^{2+/+}$                | 0.970                     | ref <sup>25</sup>    |
| 2       | $[\text{UO}_2\text{-(salen)-DMSO}]^{0/1-}$            | 1.602                     | ref <sup>25</sup>    |
| 3       | $[\text{UO}_2\text{-(saloph)-DMSO}]^{0/1-}$           | 1.550                     | ref <sup>26</sup>    |
| 4       | $[\text{UO}_2\text{-saldien}]^{0/1-}$                 | 1.582                     | ref <sup>27</sup>    |
| 5       | $[\text{UO}_2\text{-(acac)}_2\text{-DMSO}]^{0/1-}$    | 1.440                     | ref <sup>25,28</sup> |
| 6       | $[\text{UO}_2\text{-(trop)}_2\text{-DMSO}]^{0/1-}$    | 1.379                     | ref <sup>25</sup>    |
| 7       | $[\text{UO}_2\text{-(sap)-(DMSO)}_2]^{0/1-}$          | 1.500                     | ref <sup>25</sup>    |
| 8       | $[\text{UO}_2\text{-(dbm)}_2\text{-DMSO}]^{0/1-}$     | 1.360                     | ref <sup>28</sup>    |
| 9       | $[\text{UO}_2\text{-(hfacac)}_2\text{-DMSO}]^{0/1-}$  | 0.970                     | ref <sup>29,28</sup> |
| 10      | $[\text{UO}_2\text{-(dpm)}_2\text{-DMSO}]^{0/1-}$     | 1.520                     | ref <sup>29</sup>    |
| 11      | $[\text{UO}_2\text{-(btfacac)}_2\text{-DMSO}]^{0/1-}$ | 1.073                     | ref <sup>25</sup>    |
| 12      | $[\text{UO}_2\text{-(tfacac)}_2\text{-DMSO}]^{0/1-}$  | 1.050                     | ref <sup>28</sup>    |
| 13      | $[\text{UO}_2\text{-(ttfacac)}_2\text{-DMSO}]^{0/1-}$ | 1.082                     | ref <sup>25</sup>    |
| 14      | $[\text{UO}_2\text{-(tsmc)-(Nyl-OH)}]^{0/1-}$         | 1.617 <sup>a</sup>        | ref <sup>30</sup>    |
| 15      | $[\text{UO}_2\text{-(sldh)(AcO)-DMSO}]^{0/1-}$        | 1.717 <sup>a</sup>        | ref <sup>31</sup>    |
| 16      | $[\text{UO}_2\text{-salterp}]^{0/1-}$                 | 1.560                     | ref <sup>32</sup>    |
| 17      | $[\text{UO}_2\text{-(salddt-NEt}_2)]^{0/1-}$          | 1.550                     | ref <sup>32</sup>    |
| 18      | $[\text{UO}_2\text{-(salacen)-DMSO}]^{0/1-}$          | 1.140                     | ref <sup>33</sup>    |
| 19      | $[\text{UO}_2\text{-(appen)-DMSO}]^{0/1-}$            | 1.650                     | ref <sup>33</sup>    |
| 20      | $[\text{UO}_2\text{-(ac-o-ac)-DMSO}]^{0/1-}$          | 1.450                     | ref <sup>34</sup>    |
| 21      | $[\text{UO}_2\text{-(ac-ph-ac)-DMSO}]^{0/1-}$         | 1.460                     | ref <sup>34</sup>    |
| 22      | $[\text{UO}_2\text{-(salbiby)-DMSO}]^{0/1-}$          | 1.610                     | ref <sup>32</sup>    |
| 23      | $[\text{UO}_2\text{-saldien-(NEt}_2)_2]^{0/1-}$       | 1.660                     | ref <sup>32</sup>    |
| 24      | $[\text{UO}_2\text{-(sal-ph-dien)}]^{0/1-}$           | 1.630                     | ref <sup>32</sup>    |

|    |                                                                              |                    |                       |
|----|------------------------------------------------------------------------------|--------------------|-----------------------|
| 25 | [UO <sub>2</sub> -(ba) <sub>2</sub> -DMSO] <sup>0/1-</sup>                   | 1.416              | ref <sup>25</sup>     |
|    | <b>DMF</b>                                                                   |                    |                       |
| 26 | [UO <sub>2</sub> -salen-DMF] <sup>0/1-</sup>                                 | 1.672              | ref <sup>35, 36</sup> |
| 27 | [UO <sub>2</sub> -saloph-DMF] <sup>0/1-</sup>                                | 1.626              | ref <sup>26</sup>     |
| 28 | [UO <sub>2</sub> -(acac) <sub>2</sub> -DMF] <sup>0/1-</sup>                  | 1.469              | ref <sup>35, 36</sup> |
| 29 | [UO <sub>2</sub> -(DMF) <sub>5</sub> ] <sup>2+/-</sup>                       | 0.889              | ref <sup>35, 36</sup> |
| 30 | [UO <sub>2</sub> -(trop) <sub>2</sub> -DMF] <sup>0/1-</sup>                  | 1.456              | ref <sup>35</sup>     |
| 31 | [UO <sub>2</sub> -sap-(DMF) <sub>2</sub> ] <sup>0/1-</sup>                   | 1.585              | ref <sup>35</sup>     |
| 32 | [UO <sub>2</sub> -(dbm) <sub>2</sub> -DMF] <sup>0/1-</sup>                   | 1.461              | ref <sup>35</sup>     |
| 33 | [UO <sub>2</sub> -(btfacac) <sub>2</sub> -DMF] <sup>0/1-</sup>               | 1.183              | ref <sup>35</sup>     |
| 34 | [UO <sub>2</sub> -(ttfacac) <sub>2</sub> -DMF] <sup>0/1-</sup>               | 1.176              | ref <sup>35</sup>     |
| 35 | [UO <sub>2</sub> -(fod) <sub>2</sub> -DMF] <sup>0/1-</sup>                   | 1.210              | ref <sup>29</sup>     |
| 36 | [UO <sub>2</sub> -salbity-DMF] <sup>0/1-</sup>                               | 1.620              | ref <sup>32</sup>     |
|    | <b>DCM</b>                                                                   |                    |                       |
| 37 | [UO <sub>2</sub> (L1)-(acac)] <sup>0/1-</sup>                                | 1.820              | ref <sup>37</sup>     |
| 38 | [UO <sub>2</sub> (L1)-(dbm)] <sup>0/1-</sup>                                 | 1.590              | ref <sup>37</sup>     |
| 39 | [UO <sub>2</sub> (L1)-(hfacac)] <sup>0/1-</sup>                              | 1.390              | ref <sup>37</sup>     |
| 40 | [UO <sub>2</sub> -(L2) <sub>2</sub> ] <sup>0/1-</sup>                        | 1.520              | ref <sup>38</sup>     |
| 41 | [UO <sub>2</sub> -(L3) <sub>2</sub> ] <sup>0/1-</sup>                        | 1.350              | ref <sup>38</sup>     |
| 42 | [UO <sub>2</sub> -(L4+M)] <sup>+/0</sup>                                     | 1.450              | ref <sup>39</sup>     |
| 43 | [UO <sub>2</sub> -(L5) <sub>2</sub> ] <sup>0/1-</sup>                        | 1.460              | ref <sup>40</sup>     |
| 44 | [UO <sub>2</sub> -saldien-(NEt <sub>2</sub> ) <sub>2</sub> ] <sup>0/1-</sup> | 1.430              | ref <sup>32</sup>     |
| 45 | [UO <sub>2</sub> -sal-ph-dien] <sup>0/1-</sup>                               | 1.560              | ref <sup>32</sup>     |
| 46 | [UO <sub>2</sub> -AP1] <sup>0/1-</sup>                                       | 1.530              | ref <sup>41</sup>     |
| 47 | [UO <sub>2</sub> -AP2] <sup>0/1-</sup>                                       | 1.700              | ref <sup>41</sup>     |
| 48 | [UO <sub>2</sub> -AP3] <sup>0/1-</sup>                                       | 1.640              | ref <sup>41</sup>     |
| 49 | [UO <sub>2</sub> -salddt] <sup>0/1-</sup>                                    | 1.620              | ref <sup>32</sup>     |
|    | <b>Acetonitrile</b>                                                          |                    |                       |
| 50 | [UO <sub>2</sub> -(L4+DP)] <sup>1+/0</sup>                                   | 1.140              | ref <sup>39</sup>     |
| 51 | [UO <sub>2</sub> -tsmc-(Nyl-OH)] <sup>0/1-</sup>                             | 1.280 <sup>b</sup> | ref <sup>30</sup>     |



|    |                                                                              |                    |                   |
|----|------------------------------------------------------------------------------|--------------------|-------------------|
| 52 | [UO <sub>2</sub> -saloph1-H <sub>2</sub> O] <sup>0/1-</sup>                  | 1.360 <sup>c</sup> | ref <sup>42</sup> |
| 53 | [UO <sub>2</sub> -saloph2-H <sub>2</sub> O] <sup>0/1-</sup>                  | 1.428 <sup>c</sup> | ref <sup>42</sup> |
| 54 | [UO <sub>2</sub> -saloph3-H <sub>2</sub> O] <sup>0/1-</sup>                  | 1.360 <sup>c</sup> | ref <sup>42</sup> |
| 55 | [UO <sub>2</sub> -saloph4-H <sub>2</sub> O] <sup>0/1-</sup>                  | 1.505 <sup>c</sup> | ref <sup>42</sup> |
| 56 | [UO <sub>2</sub> -saloph5-H <sub>2</sub> O] <sup>0/1-</sup>                  | 1.348 <sup>c</sup> | ref <sup>42</sup> |
| 57 | [UO <sub>2</sub> -(CMPO + 2NO <sub>3</sub> )] <sup>0/1-</sup>                | 1.250              | ref <sup>43</sup> |
|    | <b>Pyridine</b>                                                              |                    |                   |
| 58 | [UO <sub>2</sub> -(Py) <sub>5</sub> ] <sup>2+/-</sup>                        | 0.910              | ref <sup>44</sup> |
| 59 | [UO <sub>2</sub> -salen-Py] <sup>0/1-</sup>                                  | 1.610              | ref <sup>32</sup> |
| 60 | [UO <sub>2</sub> -saloph-Py] <sup>0/1-</sup>                                 | 1.570              | ref <sup>32</sup> |
| 61 | [UO <sub>2</sub> -salan-tBu <sub>2</sub> -Py] <sup>0/1-</sup>                | 1.820              | ref <sup>44</sup> |
| 62 | [UO <sub>2</sub> -saloph-tBu <sub>2</sub> -Py] <sup>0/1-</sup>               | 1.670              | ref <sup>44</sup> |
| 63 | [UO <sub>2</sub> -saloph-tBu <sub>2</sub> -Py-K] <sup>+0</sup>               | 1.650              | ref <sup>44</sup> |
| 64 | [UO <sub>2</sub> -saldien-(NEt <sub>2</sub> ) <sub>2</sub> ] <sup>0/1-</sup> | 1.780              | ref <sup>32</sup> |
| 65 | [UO <sub>2</sub> -salterp] <sup>0/1-</sup>                                   | 1.690              | ref <sup>32</sup> |
| 66 | [UO <sub>2</sub> -sal-ph-dien] <sup>0/1-</sup>                               | 1.790              | ref <sup>32</sup> |
| 67 | [UO <sub>2</sub> -salddt] <sup>0/1-</sup>                                    | 1.560              | ref <sup>32</sup> |
| 68 | [UO <sub>2</sub> -salbiby-Py] <sup>0/1-</sup>                                | 1.670              | ref <sup>32</sup> |

<sup>a</sup> The uranyl(VI/V) reduction potentials were reported with respect the SCE reference electrode in DMSO; to convert the reported values with respect to the Fc/Fc<sup>+</sup> -0.575 eV has to be added. (Fc/Fc<sup>+</sup> [-0.53 eV] vs Ag/Ag<sup>+</sup> and Ag/Ag<sup>+</sup> [-0.047 eV] vs SCE).

<sup>b</sup> The uranyl(VI/V) reduction potentials were reported with respect to the SCE reference electrode in ACN solvent; to convert the reported values with respect to the Fc/Fc<sup>+</sup> -0.380 eV has to be added.

<sup>c</sup> The uranyl(VI/V) reduction potentials were reported with respect the Ag/Ag<sup>+</sup> reference electrode in ACN solvent; to convert the reported values with respect to the Fc/Fc<sup>+</sup> -0.420 eV has to be added.

**Table S2.** Abbreviations of the ligands investigated in this study.

| Short name | Full name       |
|------------|-----------------|
| acac       | Acetylacetonate |

|                                         |                                                                                                   |
|-----------------------------------------|---------------------------------------------------------------------------------------------------|
| ac-o-ac                                 | 8-oxo-2,4,12-tetraoxapenta decane                                                                 |
| ac-ph-ac                                | m-bis(2,4-dioxo-1-pentyl)benzene                                                                  |
| ba                                      | benzoyl acetate                                                                                   |
| btfacac                                 | benzoyl trifluoroacetylacetate                                                                    |
| CMPO                                    | n-Octyl(phenyl)-N,N-diisobutylcarbamoylmethylphosphine oxide                                      |
| dbm                                     | Dibenzoylmethane                                                                                  |
| DPPMO2                                  | Bis(diphenylphosphino)methanedioxide                                                              |
| DMSO                                    | Dimethylsulfoxide                                                                                 |
| DMF                                     | Dimethylformamide                                                                                 |
| dpm                                     | Dipivalylmethane                                                                                  |
| hfacac                                  | Hexafluoroacetylacetate                                                                           |
| fod                                     | Heptafluorobutanoyl-pivalylmethane                                                                |
| sap                                     | salicylidene-2-aminophenol                                                                        |
| salbipy                                 | 6,6'-Bis(2-hydroxyphenyl)-2,2'-bipyridine                                                         |
| salen                                   | Bis(salicylidene)ethylenediamine                                                                  |
| saloph                                  | Bis(salicylidene)phenylenediamine                                                                 |
| salterp                                 | 6,6-Bis(2-hydroxyphenyl)-2,2'-6', 2'-terpyridine                                                  |
| saldien(Et <sub>2</sub> N) <sub>2</sub> | N,N'-Bis((4-diethylamino)salicylidene) diethylenetriamine                                         |
| saldien                                 | N,N'-disalicylidenediethylenetriamine                                                             |
| sal-ph-dien                             | N,N'-Bis((4-(diethylamino)salicylidene) diamino methyl pyridine                                   |
| saldtd                                  | N,N'-Bis((4-diethylamino)salicylidene)2,2'-diaminodiphenyl thioether                              |
| sldh                                    | salicylaldehyde-acetyl hydrazone                                                                  |
| tsmc                                    | N <sup>1</sup> -3,5-dichlorosalicylidene-N <sup>4</sup> -salicylidene-S-methylthiosemicarbazidate |
| tfacac                                  | Trifluoroacetylacetate                                                                            |
| ttfacac                                 | Thioyltrifluoroacetylacetate                                                                      |
| trop                                    | Tropolonate                                                                                       |
| TPPO                                    | Tri phenyl phosphine oxide                                                                        |
| salacen                                 | see the reference <sup>33</sup> for the synthesis and name                                        |
| appn                                    | see the reference <sup>33</sup> for the synthesis and name                                        |

## DIRECT METHOD

**Table S3. The B3LYP/B2(CPCM/UAKS)//B3LYP/B1 level of theory predicted RFEs of uranyl complexes.**

Spin-Orbit Coupling (SOC) = -0.31 eV; reference electrode (Fc/Fc<sup>+</sup>) correction (ref.c) = 0.60 eV

|    | Complexes                                                                    | Expt. | $\Delta G_{\text{red(s)}}^{\text{VI/V}}$ | $\Delta G_{\text{red}}$ | $\Delta G_{\text{red}} + \text{SOC}$ | $\Delta G_{\text{red}} + \text{ref.c}$ | $\Delta G_{\text{red}} + \text{SOC} + \text{ref.c}$ |
|----|------------------------------------------------------------------------------|-------|------------------------------------------|-------------------------|--------------------------------------|----------------------------------------|-----------------------------------------------------|
|    | <b>DMSO</b>                                                                  |       |                                          |                         |                                      |                                        |                                                     |
| 1  | [UO <sub>2</sub> -(DMSO) <sub>5</sub> ] <sup>2+/+</sup>                      | 0.970 | -4.338                                   | 0.077                   | -0.233                               | 0.677                                  | 0.367                                               |
| 2  | [UO <sub>2</sub> -salen-DMSO] <sup>0/1-</sup>                                | 1.602 | -3.466                                   | 0.949                   | 0.639                                | 1.549                                  | 1.239                                               |
| 3  | [UO <sub>2</sub> -saloph-DMSO] <sup>0/1-</sup>                               | 1.550 | -3.436                                   | 0.979                   | 0.669                                | 1.579                                  | 1.269                                               |
| 4  | [UO <sub>2</sub> -saldien] <sup>0/1-</sup>                                   | 1.582 | -3.548                                   | 0.867                   | 0.557                                | 1.467                                  | 1.157                                               |
| 5  | [UO <sub>2</sub> -(acac) <sub>2</sub> -DMSO] <sup>0/1-</sup>                 | 1.440 | -3.589                                   | 0.826                   | 0.516                                | 1.426                                  | 1.116                                               |
| 6  | [UO <sub>2</sub> -(trop) <sub>2</sub> -DMSO] <sup>0/1-</sup>                 | 1.379 | -3.697                                   | 0.718                   | 0.408                                | 1.318                                  | 1.008                                               |
| 7  | [UO <sub>2</sub> -sap-(DMSO) <sub>2</sub> ] <sup>0/1-</sup>                  | 1.500 | -3.400                                   | 1.015                   | 0.705                                | 1.615                                  | 1.305                                               |
| 8  | [UO <sub>2</sub> -(dbm) <sub>2</sub> -DMSO] <sup>0/1-</sup>                  | 1.360 | -3.700                                   | 0.715                   | 0.405                                | 1.315                                  | 1.005                                               |
| 9  | [UO <sub>2</sub> -(hfacac) <sub>2</sub> -DMSO] <sup>0/1-</sup>               | 0.970 | -4.401                                   | 0.014                   | -0.296                               | 0.614                                  | 0.304                                               |
| 10 | [UO <sub>2</sub> -(dpm) <sub>2</sub> -DMSO] <sup>0/1-</sup>                  | 1.520 | -3.177                                   | 1.238                   | 0.928                                | 1.838                                  | 1.528                                               |
| 11 | [UO <sub>2</sub> -(btfacac) <sub>2</sub> -DMSO] <sup>0/1-</sup>              | 1.073 | -4.000                                   | 0.415                   | 0.105                                | 1.015                                  | 0.705                                               |
| 12 | [UO <sub>2</sub> -(ttfacac) <sub>2</sub> -DMSO] <sup>0/1-</sup>              | 1.050 | -3.984                                   | 0.431                   | 0.121                                | 1.031                                  | 0.721                                               |
| 13 | [UO <sub>2</sub> -(tfacac) <sub>2</sub> -DMSO] <sup>0/1-</sup>               | 1.082 | -3.905                                   | 0.510                   | 0.200                                | 1.110                                  | 0.800                                               |
| 14 | [UO <sub>2</sub> -(tsmc)-(Nyl-OH)] <sup>0/1-</sup>                           | 1.617 | -3.798                                   | 0.617                   | 0.307                                | 1.217                                  | 0.907                                               |
| 15 | [UO <sub>2</sub> -(sldh)(AcO)-DMSO] <sup>0/1-</sup>                          | 1.717 | -3.750                                   | 0.665                   | 0.355                                | 1.265                                  | 0.955                                               |
| 16 | [UO <sub>2</sub> -salterp] <sup>0/1-</sup>                                   | 1.560 | -3.365                                   | 1.050                   | 0.740                                | 1.650                                  | 1.340                                               |
| 17 | [UO <sub>2</sub> -(salddt-NEt <sub>2</sub> )] <sup>0/1-</sup>                | 1.550 | -3.464                                   | 0.951                   | 0.641                                | 1.551                                  | 1.241                                               |
| 18 | [UO <sub>2</sub> -(salacen)-DMSO] <sup>0/1-</sup>                            | 1.140 | -3.844                                   | 0.571                   | 0.261                                | 1.171                                  | 0.861                                               |
| 19 | [UO <sub>2</sub> -appen-DMSO] <sup>0/1-</sup>                                | 1.650 | -3.332                                   | 1.083                   | 0.773                                | 1.683                                  | 1.373                                               |
| 20 | [UO <sub>2</sub> -(ac-o-ac)-DMSO] <sup>0/1-</sup>                            | 1.450 | -3.382                                   | 1.033                   | 0.723                                | 1.633                                  | 1.323                                               |
| 21 | [UO <sub>2</sub> -(ac-ph-ac)-DMSO] <sup>0/1-</sup>                           | 1.460 | -3.522                                   | 0.893                   | 0.583                                | 1.493                                  | 1.183                                               |
| 22 | [UO <sub>2</sub> -salbiby-DMSO] <sup>0/1-</sup>                              | 1.610 | -3.396                                   | 1.019                   | 0.709                                | 1.619                                  | 1.309                                               |
| 23 | [UO <sub>2</sub> -saldien-(NEt <sub>2</sub> ) <sub>2</sub> ] <sup>0/1-</sup> | 1.660 | -3.418                                   | 0.997                   | 0.687                                | 1.597                                  | 1.287                                               |
| 24 | [UO <sub>2</sub> -(sal-ph-dien)] <sup>0/1-</sup>                             | 1.630 | -3.341                                   | 1.074                   | 0.764                                | 1.674                                  | 1.364                                               |

|    |                                                                              |       |        |       |        |       |       |
|----|------------------------------------------------------------------------------|-------|--------|-------|--------|-------|-------|
| 25 | [UO <sub>2</sub> -(ba) <sub>2</sub> -DMSO] <sup>0/1-</sup>                   | 1.416 | -3.627 | 0.788 | 0.478  | 1.388 | 1.078 |
|    | <b>DMF</b>                                                                   |       |        |       |        |       |       |
| 26 | [UO <sub>2</sub> -salen-DMF] <sup>0/1-</sup>                                 | 1.672 | -3.469 | 0.981 | 0.671  | 1.581 | 1.271 |
| 27 | [UO <sub>2</sub> -saloph-DMF] <sup>0/1-</sup>                                | 1.626 | -3.494 | 0.956 | 0.646  | 1.556 | 1.246 |
| 28 | [UO <sub>2</sub> -(acac) <sub>2</sub> -DMF] <sup>0/1-</sup>                  | 1.469 | -3.346 | 1.104 | 0.794  | 1.704 | 1.394 |
| 29 | [UO <sub>2</sub> -(DMF) <sub>5</sub> ] <sup>2+/-</sup>                       | 0.889 | -4.336 | 0.114 | -0.196 | 0.714 | 0.404 |
| 30 | [UO <sub>2</sub> -(trop) <sub>2</sub> -DMF] <sup>0/1-</sup>                  | 1.456 | -3.737 | 0.713 | 0.403  | 1.313 | 1.003 |
| 31 | [UO <sub>2</sub> -sap-(DMF) <sub>2</sub> ] <sup>0/1-</sup>                   | 1.585 | -3.393 | 1.057 | 0.747  | 1.657 | 1.347 |
| 32 | [UO <sub>2</sub> -(dbm) <sub>2</sub> -DMF] <sup>0/1-</sup>                   | 1.461 | -3.538 | 0.912 | 0.602  | 1.512 | 1.202 |
| 33 | [UO <sub>2</sub> -(btfacac) <sub>2</sub> -DMF] <sup>0/1-</sup>               | 1.183 | -3.935 | 0.515 | 0.205  | 1.115 | 0.805 |
| 34 | [UO <sub>2</sub> -(ttfacac) <sub>2</sub> -DMF] <sup>0/1-</sup>               | 1.176 | -3.976 | 0.474 | 0.164  | 1.074 | 0.764 |
| 35 | [UO <sub>2</sub> -(fod) <sub>2</sub> -DMF] <sup>0/1-</sup>                   | 1.210 | -3.828 | 0.622 | 0.312  | 1.222 | 0.912 |
| 36 | [UO <sub>2</sub> -salbity-DMF] <sup>0/1-</sup>                               | 1.620 | -3.264 | 1.186 | 0.876  | 1.786 | 1.476 |
|    | <b>DCM</b>                                                                   |       |        |       |        |       |       |
| 37 | [UO <sub>2</sub> (L1)-(acac)] <sup>0/1-</sup>                                | 1.820 | -3.380 | 1.203 | 0.893  | 1.803 | 1.493 |
| 38 | [UO <sub>2</sub> (L1)-(dbm)] <sup>0/1-</sup>                                 | 1.590 | -3.513 | 1.070 | 0.760  | 1.670 | 1.360 |
| 39 | [UO <sub>2</sub> (L1)-(hfacac)] <sup>0/1-</sup>                              | 1.390 | -3.760 | 0.823 | 0.513  | 1.423 | 1.113 |
| 40 | [UO <sub>2</sub> -(L2) <sub>2</sub> ] <sup>0/1-</sup>                        | 1.520 | -3.503 | 1.080 | 0.770  | 1.680 | 1.370 |
| 41 | [UO <sub>2</sub> -(L3) <sub>2</sub> ] <sup>0/1-</sup>                        | 1.350 | -3.538 | 1.045 | 0.735  | 1.645 | 1.335 |
| 42 | [UO <sub>2</sub> -(L4+M)] <sup>+0</sup>                                      | 1.450 | -3.818 | 0.765 | 0.455  | 1.365 | 1.055 |
| 43 | [UO <sub>2</sub> -(L5) <sub>2</sub> ] <sup>0/1-</sup>                        | 1.460 | -3.621 | 0.962 | 0.652  | 1.562 | 1.252 |
| 44 | [UO <sub>2</sub> -saldien-(NEt <sub>2</sub> ) <sub>2</sub> ] <sup>0/1-</sup> | 1.430 | -3.233 | 1.350 | 1.040  | 1.950 | 1.640 |
| 45 | [UO <sub>2</sub> -sal-ph-dien] <sup>0/1-</sup>                               | 1.560 | -3.184 | 1.399 | 1.089  | 1.999 | 1.689 |
| 46 | [UO <sub>2</sub> -AP1] <sup>0/1-</sup>                                       | 1.530 | -3.122 | 1.461 | 1.151  | 2.061 | 1.751 |
| 47 | [UO <sub>2</sub> -AP2] <sup>0/1-</sup>                                       | 1.700 | -3.206 | 1.377 | 1.067  | 1.977 | 1.667 |
| 48 | [UO <sub>2</sub> -AP3] <sup>0/1-</sup>                                       | 1.640 | -3.306 | 1.277 | 0.967  | 1.877 | 1.567 |
| 49 | [UO <sub>2</sub> -salddt] <sup>0/1-</sup>                                    | 1.620 | -3.338 | 1.245 | 0.935  | 1.845 | 1.535 |
|    | <b>ACN</b>                                                                   |       |        |       |        |       |       |
| 50 | [UO <sub>2</sub> -(L4+DP)] <sup>1+0</sup>                                    | 1.140 | -3.777 | 0.747 | 0.437  | 1.347 | 1.037 |
| 51 | [UO <sub>2</sub> -tsmc-(Nyl-OH)] <sup>0/1-</sup>                             | 1.280 | -3.804 | 0.720 | 0.410  | 1.320 | 1.010 |
| 52 | [UO <sub>2</sub> -saloph1-H <sub>2</sub> O] <sup>0/1-</sup>                  | 1.360 | -3.523 | 1.001 | 0.691  | 1.601 | 1.291 |

|    |                                                                              |       |        |              |              |              |              |
|----|------------------------------------------------------------------------------|-------|--------|--------------|--------------|--------------|--------------|
| 53 | [UO <sub>2</sub> -saloph2-H <sub>2</sub> O] <sup>0/1-</sup>                  | 1.428 | -3.641 | 0.883        | 0.573        | 1.483        | 1.173        |
| 54 | [UO <sub>2</sub> -saloph3-H <sub>2</sub> O] <sup>0/1-</sup>                  | 1.360 | -3.594 | 0.930        | 0.620        | 1.530        | 1.220        |
| 55 | [UO <sub>2</sub> -saloph4-H <sub>2</sub> O] <sup>0/1-</sup>                  | 1.505 | -3.449 | 1.075        | 0.765        | 1.675        | 1.365        |
| 56 | [UO <sub>2</sub> -saloph5-H <sub>2</sub> O] <sup>0/1-</sup>                  | 1.348 | -3.615 | 0.909        | 0.599        | 1.509        | 1.199        |
| 57 | [UO <sub>2</sub> -(CMPO + 2NO <sub>3</sub> )] <sup>0/1-</sup>                | 1.250 | -3.994 | 0.530        | 0.220        | 1.130        | 0.820        |
|    | <b>Py</b>                                                                    |       |        |              |              |              |              |
| 58 | [UO <sub>2</sub> -(Py) <sub>5</sub> ] <sup>2+/+</sup>                        | 0.910 | -4.888 | 0.091        | -0.219       | 0.691        | 0.381        |
| 59 | [UO <sub>2</sub> -salen-Py] <sup>0/1-</sup>                                  | 1.610 | -3.802 | 1.177        | 0.867        | 1.777        | 1.467        |
| 60 | [UO <sub>2</sub> -saloph-Py] <sup>0/1-</sup>                                 | 1.570 | -3.833 | 1.146        | 0.836        | 1.746        | 1.436        |
| 61 | [UO <sub>2</sub> -salan-tBu <sub>2</sub> -Py] <sup>0/1-</sup>                | 1.820 | -3.379 | 1.600        | 1.290        | 2.200        | 1.890        |
| 62 | [UO <sub>2</sub> -saloph-tBu <sub>2</sub> -Py] <sup>0/1-</sup>               | 1.670 | -3.819 | 1.160        | 0.850        | 1.760        | 1.450        |
| 63 | [UO <sub>2</sub> -saloph-tBu <sub>2</sub> -Py-K] <sup>+0</sup>               | 1.650 | -3.853 | 1.126        | 0.816        | 1.726        | 1.416        |
| 64 | [UO <sub>2</sub> -saldien-(NEt <sub>2</sub> ) <sub>2</sub> ] <sup>0/1-</sup> | 1.780 | -3.646 | 1.333        | 1.023        | 1.933        | 1.623        |
| 65 | [UO <sub>2</sub> -salterp] <sup>0/1-</sup>                                   | 1.690 | -3.435 | 1.544        | 1.234        | 2.144        | 1.834        |
| 66 | [UO <sub>2</sub> -sal-ph-dien] <sup>0/1-</sup>                               | 1.790 | -3.493 | 1.486        | 1.176        | 2.086        | 1.776        |
| 67 | [UO <sub>2</sub> -salddt] <sup>0/1-</sup>                                    | 1.560 | -3.624 | 1.355        | 1.045        | 1.955        | 1.645        |
| 68 | [UO <sub>2</sub> -salbivy-Py] <sup>0/1-</sup>                                | 1.670 | -3.509 | 1.470        | 1.160        | 2.070        | 1.760        |
|    | MUE                                                                          | -     | -      | <b>0.527</b> | <b>0.837</b> | <b>0.162</b> | <b>0.266</b> |

**Table S4. The M06/B2(CPCM/UAKS)//B3LYP/B1 level of theory predicted RFEs of uranyl complexes.**

Spin-Orbit Coupling (SOC) = -0.31 eV; reference electrode (Fc/Fc<sup>+</sup>) correction (ref.c) = 0.285 eV

|   | Complexes                                                    | Expt. | $\Delta G_{\text{red(s)}}^{\text{VI/V}}$ | $\Delta G_{\text{red}}$ | $\Delta G_{\text{red}} + \text{SOC}$ | $\Delta G_{\text{red}} + \text{ref.c}$ | $\Delta G_{\text{red}} + \text{SOC} + \text{ref.c}$ |
|---|--------------------------------------------------------------|-------|------------------------------------------|-------------------------|--------------------------------------|----------------------------------------|-----------------------------------------------------|
|   | <b>DMSO</b>                                                  |       |                                          |                         |                                      |                                        |                                                     |
| 1 | [UO <sub>2</sub> -(DMSO) <sub>5</sub> ] <sup>2+/+</sup>      | 0.970 | -4.830                                   | -0.096                  | -0.406                               | 0.189                                  | -0.121                                              |
| 2 | [UO <sub>2</sub> -salen-DMSO] <sup>0/1-</sup>                | 1.602 | -3.825                                   | 0.909                   | 0.599                                | 1.194                                  | 0.884                                               |
| 3 | [UO <sub>2</sub> -saloph-DMSO] <sup>0/1-</sup>               | 1.550 | -3.812                                   | 0.922                   | 0.612                                | 1.207                                  | 0.897                                               |
| 4 | [UO <sub>2</sub> -saldien] <sup>0/1-</sup>                   | 1.582 | -3.882                                   | 0.852                   | 0.542                                | 1.137                                  | 0.827                                               |
| 5 | [UO <sub>2</sub> -(acac) <sub>2</sub> -DMSO] <sup>0/1-</sup> | 1.440 | -3.912                                   | 0.822                   | 0.512                                | 1.107                                  | 0.797                                               |
| 6 | [UO <sub>2</sub> -(trop) <sub>2</sub> -DMSO] <sup>0/1-</sup> | 1.379 | -4.036                                   | 0.698                   | 0.388                                | 0.983                                  | 0.673                                               |

|    |                                                                              |       |        |        |        |       |        |
|----|------------------------------------------------------------------------------|-------|--------|--------|--------|-------|--------|
| 7  | [UO <sub>2</sub> -sap-(DMSO) <sub>2</sub> ] <sup>0/1-</sup>                  | 1.500 | -3.840 | 0.894  | 0.584  | 1.179 | 0.869  |
| 8  | [UO <sub>2</sub> -(dbm) <sub>2</sub> -DMSO] <sup>0/1-</sup>                  | 1.360 | -3.988 | 0.746  | 0.436  | 1.031 | 0.721  |
| 9  | [UO <sub>2</sub> -(hfacac) <sub>2</sub> -DMSO] <sup>0/1-</sup>               | 0.970 | -4.607 | 0.127  | -0.183 | 0.412 | 0.102  |
| 10 | [UO <sub>2</sub> -(dpm) <sub>2</sub> -DMSO] <sup>0/1-</sup>                  | 1.520 | -3.467 | 1.267  | 0.957  | 1.552 | 1.242  |
| 11 | [UO <sub>2</sub> -(btfacac) <sub>2</sub> -DMSO] <sup>0/1-</sup>              | 1.073 | -4.275 | 0.459  | 0.149  | 0.744 | 0.434  |
| 12 | [UO <sub>2</sub> -(tffacac) <sub>2</sub> -DMSO] <sup>0/1-</sup>              | 1.050 | -4.265 | 0.469  | 0.159  | 0.754 | 0.444  |
| 13 | [UO <sub>2</sub> -(tfacac) <sub>2</sub> -DMSO] <sup>0/1-</sup>               | 1.082 | -4.200 | 0.534  | 0.224  | 0.819 | 0.509  |
| 14 | [UO <sub>2</sub> -(tsmc)-(Nyl-OH)] <sup>0/1-</sup>                           | 1.617 | -4.120 | 0.614  | 0.304  | 0.899 | 0.589  |
| 15 | [UO <sub>2</sub> -(sldh)(AcO)-DMSO] <sup>0/1-</sup>                          | 1.717 | -4.092 | 0.642  | 0.332  | 0.927 | 0.617  |
| 16 | [UO <sub>2</sub> -salterp] <sup>0/1-</sup>                                   | 1.560 | -3.398 | 1.336  | 1.026  | 1.621 | 1.311  |
| 17 | [UO <sub>2</sub> -(salddt-NEt <sub>2</sub> )] <sup>0/1-</sup>                | 1.550 | -3.827 | 0.907  | 0.597  | 1.192 | 0.882  |
| 18 | [UO <sub>2</sub> -(salacen)-DMSO] <sup>0/1-</sup>                            | 1.140 | -4.210 | 0.524  | 0.214  | 0.809 | 0.499  |
| 19 | [UO <sub>2</sub> -appen-DMSO] <sup>0/1-</sup>                                | 1.650 | -3.693 | 1.041  | 0.731  | 1.326 | 1.016  |
| 20 | [UO <sub>2</sub> -(ac-o-ac)-DMSO] <sup>0/1-</sup>                            | 1.450 | -3.738 | 0.996  | 0.686  | 1.281 | 0.971  |
| 21 | [UO <sub>2</sub> -(ac-ph-ac)-DMSO] <sup>0/1-</sup>                           | 1.460 | -3.855 | 0.879  | 0.569  | 1.164 | 0.854  |
| 22 | [UO <sub>2</sub> -salbiby-DMSO] <sup>0/1-</sup>                              | 1.610 | -3.760 | 0.974  | 0.664  | 1.259 | 0.949  |
| 23 | [UO <sub>2</sub> -saldien-(NEt <sub>2</sub> ) <sub>2</sub> ] <sup>0/1-</sup> | 1.660 | -3.765 | 0.969  | 0.659  | 1.254 | 0.944  |
| 24 | [UO <sub>2</sub> -(sal-ph-dien)] <sup>0/1-</sup>                             | 1.630 | -3.710 | 1.024  | 0.714  | 1.309 | 0.999  |
| 25 | [UO <sub>2</sub> -(ba) <sub>2</sub> -DMSO] <sup>0/1-</sup>                   | 1.416 | -3.933 | 0.801  | 0.491  | 1.086 | 0.776  |
|    | <b>DMF</b>                                                                   |       |        |        |        |       |        |
| 26 | [UO <sub>2</sub> -salen-DMF] <sup>0/1-</sup>                                 | 1.672 | -3.822 | 0.929  | 0.619  | 1.214 | 0.904  |
| 27 | [UO <sub>2</sub> -saloph-DMF] <sup>0/1-</sup>                                | 1.626 | -3.834 | 0.917  | 0.607  | 1.202 | 0.892  |
| 28 | [UO <sub>2</sub> -(acac) <sub>2</sub> -DMF] <sup>0/1-</sup>                  | 1.469 | -3.773 | 0.978  | 0.668  | 1.263 | 0.953  |
| 29 | [UO <sub>2</sub> -(DMF) <sub>5</sub> ] <sup>2+/-</sup>                       | 0.889 | -4.807 | -0.056 | -0.366 | 0.229 | -0.081 |
| 30 | [UO <sub>2</sub> -(trop) <sub>2</sub> -DMF] <sup>0/1-</sup>                  | 1.456 | -4.072 | 0.679  | 0.369  | 0.964 | 0.654  |
| 31 | [UO <sub>2</sub> -sap-(DMF) <sub>2</sub> ] <sup>0/1-</sup>                   | 1.585 | -3.773 | 0.978  | 0.668  | 1.263 | 0.953  |
| 32 | [UO <sub>2</sub> -(dbm) <sub>2</sub> -DMF] <sup>0/1-</sup>                   | 1.461 | -3.929 | 0.822  | 0.512  | 1.107 | 0.797  |
| 33 | [UO <sub>2</sub> -(btfacac) <sub>2</sub> -DMF] <sup>0/1-</sup>               | 1.183 | -4.201 | 0.550  | 0.240  | 0.835 | 0.525  |
| 34 | [UO <sub>2</sub> -(tffacac) <sub>2</sub> -DMF] <sup>0/1-</sup>               | 1.176 | -4.236 | 0.515  | 0.205  | 0.800 | 0.490  |
| 35 | [UO <sub>2</sub> -(fod) <sub>2</sub> -DMF] <sup>0/1-</sup>                   | 1.210 | -4.107 | 0.644  | 0.334  | 0.929 | 0.619  |
| 36 | [UO <sub>2</sub> -salbiby-DMF] <sup>0/1-</sup>                               | 1.620 | -3.518 | 1.233  | 0.923  | 1.518 | 1.208  |

|    |                                                                              |       |        |        |        |        |        |
|----|------------------------------------------------------------------------------|-------|--------|--------|--------|--------|--------|
|    | <b>DCM</b>                                                                   |       |        |        |        |        |        |
| 37 | [UO <sub>2</sub> (L1)-(acac)] <sup>0/1-</sup>                                | 1.820 | -3.510 | 1.394  | 1.084  | 1.679  | 1.369  |
| 38 | [UO <sub>2</sub> (L1)-(dbm)] <sup>0/1-</sup>                                 | 1.590 | -3.637 | 1.267  | 0.957  | 1.552  | 1.242  |
| 39 | [UO <sub>2</sub> (L1)-(hfacac)] <sup>0/1-</sup>                              | 1.390 | -3.802 | 1.102  | 0.792  | 1.387  | 1.077  |
| 40 | [UO <sub>2</sub> -(L2) <sub>2</sub> ] <sup>0/1-</sup>                        | 1.520 | -3.713 | 1.191  | 0.881  | 1.476  | 1.166  |
| 41 | [UO <sub>2</sub> -(L3) <sub>2</sub> ] <sup>0/1-</sup>                        | 1.350 | -3.764 | 1.140  | 0.830  | 1.425  | 1.115  |
| 42 | [UO <sub>2</sub> -(L4+M)] <sup>+0</sup>                                      | 1.450 | -4.118 | 0.786  | 0.476  | 1.071  | 0.761  |
| 43 | [UO <sub>2</sub> -(L5) <sub>2</sub> ] <sup>0/1-</sup>                        | 1.460 | -3.906 | 0.998  | 0.688  | 1.283  | 0.973  |
| 44 | [UO <sub>2</sub> -saldien-(NEt <sub>2</sub> ) <sub>2</sub> ] <sup>0/1-</sup> | 1.430 | -3.589 | 1.315  | 1.005  | 1.600  | 1.290  |
| 45 | [UO <sub>2</sub> -sal-ph-dien] <sup>0/1-</sup>                               | 1.560 | -3.482 | 1.422  | 1.112  | 1.707  | 1.397  |
| 46 | [UO <sub>2</sub> -AP1] <sup>0/1-</sup>                                       | 1.530 | -3.156 | 1.748  | 1.438  | 2.033  | 1.723  |
| 47 | [UO <sub>2</sub> -AP2] <sup>0/1-</sup>                                       | 1.700 | -3.414 | 1.490  | 1.180  | 1.775  | 1.465  |
| 48 | [UO <sub>2</sub> -AP3] <sup>0/1-</sup>                                       | 1.640 | -3.638 | 1.266  | 0.956  | 1.551  | 1.241  |
| 49 | [UO <sub>2</sub> -saldtdt] <sup>0/1-</sup>                                   | 1.620 | -3.698 | 1.206  | 0.896  | 1.491  | 1.181  |
|    | <b>ACN</b>                                                                   |       |        |        |        |        |        |
| 50 | [UO <sub>2</sub> -(L4+DP)] <sup>1+/0</sup>                                   | 1.140 | -4.035 | 0.714  | 0.404  | 0.999  | 0.689  |
| 51 | [UO <sub>2</sub> -tsmc-(Nyl-OH)] <sup>0/1-</sup>                             | 1.280 | -4.127 | 0.622  | 0.312  | 0.907  | 0.597  |
| 52 | [UO <sub>2</sub> -saloph1-H <sub>2</sub> O] <sup>0/1-</sup>                  | 1.360 | -3.926 | 0.823  | 0.513  | 1.108  | 0.798  |
| 53 | [UO <sub>2</sub> -saloph2-H <sub>2</sub> O] <sup>0/1-</sup>                  | 1.428 | -3.953 | 0.796  | 0.486  | 1.081  | 0.771  |
| 54 | [UO <sub>2</sub> -saloph3-H <sub>2</sub> O] <sup>0/1-</sup>                  | 1.360 | -3.873 | 0.876  | 0.566  | 1.161  | 0.851  |
| 55 | [UO <sub>2</sub> -saloph4-H <sub>2</sub> O] <sup>0/1-</sup>                  | 1.505 | -3.743 | 1.006  | 0.696  | 1.291  | 0.981  |
| 56 | [UO <sub>2</sub> -saloph5-H <sub>2</sub> O] <sup>0/1-</sup>                  | 1.348 | -3.954 | 0.795  | 0.485  | 1.080  | 0.770  |
| 57 | [UO <sub>2</sub> -(CMPO + 2NO <sub>3</sub> )] <sup>0/1-</sup>                | 1.250 | -4.182 | 0.567  | 0.257  | 0.852  | 0.542  |
|    | <b>Py</b>                                                                    |       |        |        |        |        |        |
| 58 | [UO <sub>2</sub> -(Py) <sub>5</sub> ] <sup>2+/+</sup>                        | 0.910 | -5.157 | -0.647 | -0.957 | -0.362 | -0.672 |
| 59 | [UO <sub>2</sub> -salen-Py] <sup>0/1-</sup>                                  | 1.610 | -4.168 | 0.342  | 0.032  | 0.627  | 0.317  |
| 60 | [UO <sub>2</sub> -saloph-Py] <sup>0/1-</sup>                                 | 1.570 | -4.234 | 0.276  | -0.034 | 0.561  | 0.251  |
| 61 | [UO <sub>2</sub> -salan-tBu <sub>2</sub> -Py] <sup>0/1-</sup>                | 1.820 | -3.810 | 0.700  | 0.390  | 0.985  | 0.675  |
| 62 | [UO <sub>2</sub> -saloph-tBu <sub>2</sub> -Py] <sup>0/1-</sup>               | 1.670 | -4.186 | 0.324  | 0.014  | 0.609  | 0.299  |
| 63 | [UO <sub>2</sub> -saloph-tBu <sub>2</sub> -Py-K] <sup>+0</sup>               | 1.650 | -4.272 | 0.238  | -0.072 | 0.523  | 0.213  |
| 64 | [UO <sub>2</sub> -saldien-(NEt <sub>2</sub> ) <sub>2</sub> ] <sup>0/1-</sup> | 1.780 | -4.000 | 0.510  | 0.200  | 0.795  | 0.485  |

|    |                                                |       |        |              |              |              |              |
|----|------------------------------------------------|-------|--------|--------------|--------------|--------------|--------------|
| 65 | [UO <sub>2</sub> -salterp] <sup>0/1-</sup>     | 1.690 | -3.214 | 1.296        | 0.986        | 1.581        | 1.271        |
| 66 | [UO <sub>2</sub> -sal-ph-dien] <sup>0/1-</sup> | 1.790 | -3.764 | 0.746        | 0.436        | 1.031        | 0.721        |
| 67 | [UO <sub>2</sub> -salddt] <sup>0/1-</sup>      | 1.560 | -3.918 | 0.592        | 0.282        | 0.877        | 0.567        |
| 68 | [UO <sub>2</sub> -salbiby-Py] <sup>0/1-</sup>  | 1.670 | -3.785 | 0.725        | 0.415        | 1.010        | 0.700        |
|    | MUE                                            | -     | -      | <b>0.656</b> | <b>0.960</b> | <b>0.396</b> | <b>0.681</b> |

### Isodesmic models

**Table S5. The predicted RFEs of uranyl complexes using the Isodesmic models.**

|    | Complexes                                                       | Expt. | B3LYP/B2(CPCM/UAKS)//B3LYP/B1                                  |                                                                           | M06/B2(CPCM/UAKS)//B3LYP/B1                                        |                                                                           |
|----|-----------------------------------------------------------------|-------|----------------------------------------------------------------|---------------------------------------------------------------------------|--------------------------------------------------------------------|---------------------------------------------------------------------------|
|    |                                                                 |       | ref:<br>[UO <sub>2</sub> (DMSO) <sub>5</sub> ] <sup>2+/+</sup> | ref:<br>[UO <sub>2</sub> (DMSO) <sub>5</sub> ] <sup>2+/+</sup> .7DMS<br>O | ref:<br>[UO <sub>2</sub> (DMSO) <sub>5</sub> ] <sup>2</sup><br>+/+ | ref:<br>[UO <sub>2</sub> (DMSO) <sub>5</sub> ] <sup>2+/+</sup> .7D<br>MSO |
| 1  | [UO <sub>2</sub> -(DMSO) <sub>5</sub> ] <sup>2+/+</sup>         | 0.970 | 0.970                                                          | 0.970                                                                     | 0.970                                                              | 0.970                                                                     |
| 2  | [UO <sub>2</sub> -salen-DMSO] <sup>0/1-</sup>                   | 1.602 | 1.842                                                          | 1.565                                                                     | 1.975                                                              | 1.740                                                                     |
| 3  | [UO <sub>2</sub> -saloph-DMSO] <sup>0/1-</sup>                  | 1.550 | 1.872                                                          | 1.595                                                                     | 1.988                                                              | 1.753                                                                     |
| 4  | [UO <sub>2</sub> -saldien] <sup>0/1-</sup>                      | 1.582 | 1.760                                                          | 1.483                                                                     | 1.918                                                              | 1.683                                                                     |
| 5  | [UO <sub>2</sub> -(acac) <sub>2</sub> -DMSO] <sup>0/1-</sup>    | 1.440 | 1.719                                                          | 1.442                                                                     | 1.888                                                              | 1.653                                                                     |
| 6  | [UO <sub>2</sub> -(trop) <sub>2</sub> -DMSO] <sup>0/1-</sup>    | 1.379 | 1.611                                                          | 1.334                                                                     | 1.764                                                              | 1.529                                                                     |
| 7  | [UO <sub>2</sub> -sap-(DMSO) <sub>2</sub> ] <sup>0/1-</sup>     | 1.500 | 1.908                                                          | 1.631                                                                     | 1.960                                                              | 1.725                                                                     |
| 8  | [UO <sub>2</sub> -(dbm) <sub>2</sub> -DMSO] <sup>0/1-</sup>     | 1.360 | 1.608                                                          | 1.331                                                                     | 1.812                                                              | 1.577                                                                     |
| 9  | [UO <sub>2</sub> -(hfacac) <sub>2</sub> -DMSO] <sup>0/1-</sup>  | 0.970 | 0.907                                                          | 0.630                                                                     | 1.193                                                              | 0.958                                                                     |
| 10 | [UO <sub>2</sub> -(dpm) <sub>2</sub> -DMSO] <sup>0/1-</sup>     | 1.520 | 2.131                                                          | 1.854                                                                     | 2.333                                                              | 2.098                                                                     |
| 11 | [UO <sub>2</sub> -(btfacac) <sub>2</sub> -DMSO] <sup>0/1-</sup> | 1.073 | 1.308                                                          | 1.031                                                                     | 1.525                                                              | 1.290                                                                     |
| 12 | [UO <sub>2</sub> -(ttfacac) <sub>2</sub> -DMSO] <sup>0/1-</sup> | 1.050 | 1.324                                                          | 1.047                                                                     | 1.535                                                              | 1.300                                                                     |
| 13 | [UO <sub>2</sub> -(tfacac) <sub>2</sub> -DMSO] <sup>0/1-</sup>  | 1.082 | 1.403                                                          | 1.126                                                                     | 1.600                                                              | 1.365                                                                     |
| 14 | [UO <sub>2</sub> -(tsmc)-(Nyl-OH)] <sup>0/1-</sup>              | 1.617 | 1.510                                                          | 1.233                                                                     | 1.680                                                              | 1.445                                                                     |
| 15 | [UO <sub>2</sub> -(sldh)(AcO)-DMSO] <sup>0/1-</sup>             | 1.717 | 1.558                                                          | 1.281                                                                     | 1.708                                                              | 1.473                                                                     |
| 16 | [UO <sub>2</sub> -salterp] <sup>0/1-</sup>                      | 1.560 | 1.943                                                          | 1.666                                                                     | 2.402                                                              | 2.167                                                                     |



|    |                                                                              |       |       |                                                             |       |       |
|----|------------------------------------------------------------------------------|-------|-------|-------------------------------------------------------------|-------|-------|
| 17 | [UO <sub>2</sub> -(salddt-NEt <sub>2</sub> )] <sup>0/1-</sup>                | 1.550 | 1.844 | 1.567                                                       | 1.973 | 1.738 |
| 18 | [UO <sub>2</sub> -(salacen)-DMSO] <sup>0/1-</sup>                            | 1.140 | 1.464 | 1.187                                                       | 1.590 | 1.355 |
| 19 | [UO <sub>2</sub> -appen-DMSO] <sup>0/1-</sup>                                | 1.650 | 1.976 | 1.699                                                       | 2.107 | 1.872 |
| 20 | [UO <sub>2</sub> -(ac-o-ac)-DMSO] <sup>0/1-</sup>                            | 1.450 | 1.926 | 1.649                                                       | 2.062 | 1.827 |
| 21 | [UO <sub>2</sub> -(ac-ph-ac)-DMSO] <sup>0/1-</sup>                           | 1.460 | 1.786 | 1.509                                                       | 1.945 | 1.710 |
| 22 | [UO <sub>2</sub> -salbiby-DMSO] <sup>0/1-</sup>                              | 1.610 | 1.912 | 1.635                                                       | 2.040 | 1.805 |
| 23 | [UO <sub>2</sub> -saldien-(NEt <sub>2</sub> ) <sub>2</sub> ] <sup>0/1-</sup> | 1.660 | 1.890 | 1.613                                                       | 2.035 | 1.800 |
| 24 | [UO <sub>2</sub> -(sal-ph-dien)] <sup>0/1-</sup>                             | 1.630 | 1.967 | 1.690                                                       | 2.090 | 1.855 |
| 25 | [UO <sub>2</sub> -(ba) <sub>2</sub> -DMSO] <sup>0/1-</sup>                   | 1.416 | 1.681 | 1.404                                                       | 1.867 | 1.632 |
|    | <b>DMF</b>                                                                   |       |       | ref : [UO <sub>2</sub> (DMF) <sub>5</sub> ] <sup>2+/+</sup> |       |       |
| 26 | [UO <sub>2</sub> -salen-DMF] <sup>0/1-</sup>                                 | 1.672 | 1.756 | 1.756                                                       | 1.874 | 1.874 |
| 27 | [UO <sub>2</sub> -saloph-DMF] <sup>0/1-</sup>                                | 1.626 | 1.731 | 1.731                                                       | 1.862 | 1.862 |
| 28 | [UO <sub>2</sub> -(acac) <sub>2</sub> -DMF] <sup>0/1-</sup>                  | 1.469 | 1.879 | 1.879                                                       | 1.923 | 1.923 |
| 29 | [UO <sub>2</sub> -(DMF) <sub>5</sub> ] <sup>2+/+</sup>                       | 0.889 | 0.889 | 0.889                                                       | 0.889 | 0.889 |
| 30 | [UO <sub>2</sub> -(trop) <sub>2</sub> -DMF] <sup>0/1-</sup>                  | 1.456 | 1.488 | 1.488                                                       | 1.624 | 1.624 |
| 31 | [UO <sub>2</sub> -sap-(DMF) <sub>2</sub> ] <sup>0/1-</sup>                   | 1.585 | 1.832 | 1.832                                                       | 1.923 | 1.923 |
| 32 | [UO <sub>2</sub> -(dbm) <sub>2</sub> -DMF] <sup>0/1-</sup>                   | 1.461 | 1.687 | 1.687                                                       | 1.767 | 1.767 |
| 33 | [UO <sub>2</sub> -(btfacac) <sub>2</sub> -DMF] <sup>0/1-</sup>               | 1.183 | 1.290 | 1.290                                                       | 1.495 | 1.495 |
| 34 | [UO <sub>2</sub> -(ttfacac) <sub>2</sub> -DMF] <sup>0/1-</sup>               | 1.176 | 1.249 | 1.249                                                       | 1.460 | 1.460 |
| 35 | [UO <sub>2</sub> -(fod) <sub>2</sub> -DMF] <sup>0/1-</sup>                   | 1.210 | 1.397 | 1.397                                                       | 1.589 | 1.589 |
| 36 | [UO <sub>2</sub> -salbiby-DMF] <sup>0/1-</sup>                               | 1.620 | 1.961 | 1.961                                                       | 2.178 | 2.178 |
|    | <b>DCM</b>                                                                   |       |       | ref: [UO <sub>2</sub> -salddt] <sup>0/1-</sup>              |       |       |
| 37 | [UO <sub>2</sub> (L1)-(acac)] <sup>0/1-</sup>                                | 1.820 | 1.578 | 1.578                                                       | 1.808 | 1.808 |
| 38 | [UO <sub>2</sub> (L1)-(dbm)] <sup>0/1-</sup>                                 | 1.590 | 1.445 | 1.445                                                       | 1.681 | 1.681 |
| 39 | [UO <sub>2</sub> (L1)-(hfacac)] <sup>0/1-</sup>                              | 1.390 | 1.198 | 1.198                                                       | 1.516 | 1.516 |
| 40 | [UO <sub>2</sub> -(L2) <sub>2</sub> ] <sup>0/1-</sup>                        | 1.520 | 1.455 | 1.455                                                       | 1.605 | 1.605 |
| 41 | [UO <sub>2</sub> -(L3) <sub>2</sub> ] <sup>0/1-</sup>                        | 1.350 | 1.420 | 1.420                                                       | 1.554 | 1.554 |
| 42 | [UO <sub>2</sub> -(L4+M)] <sup>+0</sup>                                      | 1.450 | 1.140 | 1.140                                                       | 1.200 | 1.200 |
| 43 | [UO <sub>2</sub> -(L5) <sub>2</sub> ] <sup>0/1-</sup>                        | 1.460 | 1.337 | 1.337                                                       | 1.412 | 1.412 |
| 44 | [UO <sub>2</sub> -saldien-(NEt <sub>2</sub> ) <sub>2</sub> ] <sup>0/1-</sup> | 1.430 | 1.725 | 1.725                                                       | 1.729 | 1.729 |
| 45 | [UO <sub>2</sub> -sal-ph-dien] <sup>0/1-</sup>                               | 1.560 | 1.774 | 1.774                                                       | 1.836 | 1.836 |

|    |                                                                              |       |                                                            |                                                                          |                                                                |                                                                          |
|----|------------------------------------------------------------------------------|-------|------------------------------------------------------------|--------------------------------------------------------------------------|----------------------------------------------------------------|--------------------------------------------------------------------------|
| 46 | [UO <sub>2</sub> -AP1] <sup>0/1-</sup>                                       | 1.530 | 1.836                                                      | 1.836                                                                    | 2.162                                                          | 2.162                                                                    |
| 47 | [UO <sub>2</sub> -AP2] <sup>0/1-</sup>                                       | 1.700 | 1.752                                                      | 1.752                                                                    | 1.904                                                          | 1.904                                                                    |
| 48 | [UO <sub>2</sub> -AP3] <sup>0/1-</sup>                                       | 1.640 | 1.652                                                      | 1.652                                                                    | 1.680                                                          | 1.680                                                                    |
| 49 | [UO <sub>2</sub> -salddt] <sup>0/1-</sup>                                    | 1.620 | 1.620                                                      | 1.620                                                                    | 1.620                                                          | 1.620                                                                    |
|    | <b>ACN</b>                                                                   |       | ref: [UO <sub>2</sub> -(L4+DP)] <sup>1+/0</sup>            |                                                                          |                                                                |                                                                          |
| 50 | [UO <sub>2</sub> -(L4+DP)] <sup>1+/0</sup>                                   | 1.140 | 1.140                                                      | 1.140                                                                    | 1.140                                                          | 1.140                                                                    |
| 51 | [UO <sub>2</sub> -tsmc-(Nyl-OH)] <sup>0/1-</sup>                             | 1.280 | 1.113                                                      | 1.113                                                                    | 1.048                                                          | 1.048                                                                    |
| 52 | [UO <sub>2</sub> -saloph1-H <sub>2</sub> O] <sup>0/1-</sup>                  | 1.360 | 1.394                                                      | 1.394                                                                    | 1.249                                                          | 1.249                                                                    |
| 53 | [UO <sub>2</sub> -saloph2-H <sub>2</sub> O] <sup>0/1-</sup>                  | 1.428 | 1.276                                                      | 1.276                                                                    | 1.222                                                          | 1.222                                                                    |
| 54 | [UO <sub>2</sub> -saloph3-H <sub>2</sub> O] <sup>0/1-</sup>                  | 1.360 | 1.323                                                      | 1.323                                                                    | 1.302                                                          | 1.302                                                                    |
| 55 | [UO <sub>2</sub> -saloph4-H <sub>2</sub> O] <sup>0/1-</sup>                  | 1.505 | 1.468                                                      | 1.468                                                                    | 1.432                                                          | 1.432                                                                    |
| 56 | [UO <sub>2</sub> -saloph5-H <sub>2</sub> O] <sup>0/1-</sup>                  | 1.348 | 1.302                                                      | 1.302                                                                    | 1.221                                                          | 1.221                                                                    |
| 57 | [UO <sub>2</sub> -(CMPO + 2NO <sub>3</sub> )] <sup>0/1-</sup>                | 1.250 | 0.923                                                      | 0.923                                                                    | 0.993                                                          | 0.993                                                                    |
|    | <b>Py</b>                                                                    |       | ref: [UO <sub>2</sub> -(Py) <sub>5</sub> ] <sup>2+/+</sup> | ref: [UO <sub>2</sub> -(Py) <sub>5</sub> ] <sup>2+/+</sup><br>[-0.46 eV] | ref: [UO <sub>2</sub> (Py) <sub>5</sub> ] <sup>2+<br/>/+</sup> | ref: [UO <sub>2</sub> -(Py) <sub>5</sub> ] <sup>2+/+</sup><br>[-0.46 eV] |
| 58 | [UO <sub>2</sub> -(Py) <sub>5</sub> ] <sup>2+/+</sup>                        | 0.910 | 0.910                                                      | 0.460                                                                    | 0.910                                                          | 0.460                                                                    |
| 59 | [UO <sub>2</sub> -salen-Py] <sup>0/1-</sup>                                  | 1.610 | 1.996                                                      | 1.546                                                                    | 1.899                                                          | 1.449                                                                    |
| 60 | [UO <sub>2</sub> -saloph-Py] <sup>0/1-</sup>                                 | 1.570 | 1.965                                                      | 1.515                                                                    | 1.833                                                          | 1.383                                                                    |
| 61 | [UO <sub>2</sub> -salan-tBu <sub>2</sub> -Py] <sup>0/1-</sup>                | 1.820 | 2.419                                                      | 1.969                                                                    | 2.257                                                          | 1.807                                                                    |
| 62 | [UO <sub>2</sub> -saloph-tBu <sub>2</sub> -Py] <sup>0/1-</sup>               | 1.670 | 1.979                                                      | 1.529                                                                    | 1.881                                                          | 1.431                                                                    |
| 63 | [UO <sub>2</sub> -saloph-tBu <sub>2</sub> -Py-K] <sup>+0</sup>               | 1.650 | 1.945                                                      | 1.495                                                                    | 1.795                                                          | 1.345                                                                    |
| 64 | [UO <sub>2</sub> -saldien-(NEt <sub>2</sub> ) <sub>2</sub> ] <sup>0/1-</sup> | 1.780 | 2.152                                                      | 1.702                                                                    | 2.067                                                          | 1.617                                                                    |
| 65 | [UO <sub>2</sub> -salterp] <sup>0/1-</sup>                                   | 1.690 | 2.363                                                      | 1.913                                                                    | 2.853                                                          | 2.403                                                                    |
| 66 | [UO <sub>2</sub> -sal-ph-dien] <sup>0/1-</sup>                               | 1.790 | 2.305                                                      | 1.855                                                                    | 2.303                                                          | 1.853                                                                    |
| 67 | [UO <sub>2</sub> -salddt] <sup>0/1-</sup>                                    | 1.560 | 2.174                                                      | 1.724                                                                    | 2.149                                                          | 1.699                                                                    |
| 68 | [UO <sub>2</sub> -salbiby-Py] <sup>0/1-</sup>                                | 1.670 | 2.289                                                      | 1.839                                                                    | 2.282                                                          | 1.832                                                                    |
|    | <b>MUE</b>                                                                   | -     | <b>0.240</b>                                               | <b>0.125</b>                                                             | <b>0.316</b>                                                   | <b>0.211</b>                                                             |

RFEs using empirical Fc/Fc<sup>+</sup> potentials

Table S6. The B3LYP/B2(CPCM/UAKS)//B3LYP/B1 level of theory predicted RFEs of uranyl complexes.

Spin-Orbit Coupling (SOC) = -0.31 eV; reference electrode (Fc/Fc<sup>+</sup>) correction (ref.c) = 0.60 eV

|    | Complexes                                                                    | Expt. | $\Delta G_{\text{red(s)}}^{\text{VI/V}}$ | $\Delta G_{\text{red}}$ | $\Delta G_{\text{red}} + \text{SOC}$ | $\Delta G_{\text{red}} + \text{ref.c}$ | $\Delta G_{\text{red}} + \text{SOC} + \text{ref.c}$ |
|----|------------------------------------------------------------------------------|-------|------------------------------------------|-------------------------|--------------------------------------|----------------------------------------|-----------------------------------------------------|
|    | <b>DMSO</b>                                                                  |       |                                          |                         |                                      |                                        |                                                     |
| 1  | [UO <sub>2</sub> -(DMSO) <sub>5</sub> ] <sup>2+/+</sup>                      | 0.970 | -4.338                                   | 0.864                   | 0.554                                | 1.464                                  | 1.154                                               |
| 2  | [UO <sub>2</sub> -salen-DMSO] <sup>0/1-</sup>                                | 1.602 | -3.466                                   | 1.736                   | 1.426                                | 2.336                                  | 2.026                                               |
| 3  | [UO <sub>2</sub> -saloph-DMSO] <sup>0/1-</sup>                               | 1.550 | -3.436                                   | 1.766                   | 1.456                                | 2.366                                  | 2.056                                               |
| 4  | [UO <sub>2</sub> -saldien] <sup>0/1-</sup>                                   | 1.582 | -3.548                                   | 1.654                   | 1.344                                | 2.254                                  | 1.944                                               |
| 5  | [UO <sub>2</sub> -(acac) <sub>2</sub> -DMSO] <sup>0/1-</sup>                 | 1.440 | -3.589                                   | 1.613                   | 1.303                                | 2.213                                  | 1.903                                               |
| 6  | [UO <sub>2</sub> -(trop) <sub>2</sub> -DMSO] <sup>0/1-</sup>                 | 1.379 | -3.697                                   | 1.505                   | 1.195                                | 2.105                                  | 1.795                                               |
| 7  | [UO <sub>2</sub> -sap-(DMSO) <sub>2</sub> ] <sup>0/1-</sup>                  | 1.500 | -3.400                                   | 1.802                   | 1.492                                | 2.402                                  | 2.092                                               |
| 8  | [UO <sub>2</sub> -(dbm) <sub>2</sub> -DMSO] <sup>0/1-</sup>                  | 1.360 | -3.700                                   | 1.502                   | 1.192                                | 2.102                                  | 1.792                                               |
| 9  | [UO <sub>2</sub> -(hfacac) <sub>2</sub> -DMSO] <sup>0/1-</sup>               | 0.970 | -4.401                                   | 0.801                   | 0.491                                | 1.401                                  | 1.091                                               |
| 10 | [UO <sub>2</sub> -(dpm) <sub>2</sub> -DMSO] <sup>0/1-</sup>                  | 1.520 | -3.177                                   | 2.025                   | 1.715                                | 2.625                                  | 2.315                                               |
| 11 | [UO <sub>2</sub> -(btfacac) <sub>2</sub> -DMSO] <sup>0/1-</sup>              | 1.073 | -4.000                                   | 1.202                   | 0.892                                | 1.802                                  | 1.492                                               |
| 12 | [UO <sub>2</sub> -(tffacac) <sub>2</sub> -DMSO] <sup>0/1-</sup>              | 1.050 | -3.984                                   | 1.218                   | 0.908                                | 1.818                                  | 1.508                                               |
| 13 | [UO <sub>2</sub> -(tfacac) <sub>2</sub> -DMSO] <sup>0/1-</sup>               | 1.082 | -3.905                                   | 1.297                   | 0.987                                | 1.897                                  | 1.587                                               |
| 14 | [UO <sub>2</sub> -(tsmc)-(Nyl-OH)] <sup>0/1-</sup>                           | 1.617 | -3.798                                   | 1.404                   | 1.094                                | 2.004                                  | 1.694                                               |
| 15 | [UO <sub>2</sub> -(sldh)(AcO)-DMSO] <sup>0/1-</sup>                          | 1.717 | -3.750                                   | 1.452                   | 1.142                                | 2.052                                  | 1.742                                               |
| 16 | [UO <sub>2</sub> -salterp] <sup>0/1-</sup>                                   | 1.560 | -3.365                                   | 1.837                   | 1.527                                | 2.437                                  | 2.127                                               |
| 17 | [UO <sub>2</sub> -(salddt-NEt <sub>2</sub> )] <sup>0/1-</sup>                | 1.550 | -3.464                                   | 1.738                   | 1.428                                | 2.338                                  | 2.028                                               |
| 18 | [UO <sub>2</sub> -(salacen)-DMSO] <sup>0/1-</sup>                            | 1.140 | -3.844                                   | 1.358                   | 1.048                                | 1.958                                  | 1.648                                               |
| 19 | [UO <sub>2</sub> -appen-DMSO] <sup>0/1-</sup>                                | 1.650 | -3.332                                   | 1.870                   | 1.560                                | 2.47                                   | 2.16                                                |
| 20 | [UO <sub>2</sub> -(ac-o-ac)-DMSO] <sup>0/1-</sup>                            | 1.450 | -3.382                                   | 1.820                   | 1.510                                | 2.42                                   | 2.11                                                |
| 21 | [UO <sub>2</sub> -(ac-ph-ac)-DMSO] <sup>0/1-</sup>                           | 1.460 | -3.522                                   | 1.680                   | 1.370                                | 2.28                                   | 1.97                                                |
| 22 | [UO <sub>2</sub> -salbiby-DMSO] <sup>0/1-</sup>                              | 1.610 | -3.396                                   | 1.806                   | 1.496                                | 2.406                                  | 2.096                                               |
| 23 | [UO <sub>2</sub> -saldien-(NEt <sub>2</sub> ) <sub>2</sub> ] <sup>0/1-</sup> | 1.660 | -3.418                                   | 1.784                   | 1.474                                | 2.384                                  | 2.074                                               |
| 24 | [UO <sub>2</sub> -(sal-ph-dien)] <sup>0/1-</sup>                             | 1.630 | -3.341                                   | 1.861                   | 1.551                                | 2.461                                  | 2.151                                               |

|    |                                                                              |       |        |       |       |       |       |
|----|------------------------------------------------------------------------------|-------|--------|-------|-------|-------|-------|
| 25 | [UO <sub>2</sub> -(ba) <sub>2</sub> -DMSO] <sup>0/1-</sup>                   | 1.416 | -3.627 | 1.575 | 1.265 | 2.175 | 1.865 |
|    | <b>DMF</b>                                                                   |       |        |       |       |       |       |
| 26 | [UO <sub>2</sub> -salen-DMF] <sup>0/1-</sup>                                 | 1.672 | -3.469 | 1.921 | 1.611 | 2.521 | 2.211 |
| 27 | [UO <sub>2</sub> -saloph-DMF] <sup>0/1-</sup>                                | 1.626 | -3.494 | 1.896 | 1.586 | 2.496 | 2.186 |
| 28 | [UO <sub>2</sub> -(acac) <sub>2</sub> -DMF] <sup>0/1-</sup>                  | 1.469 | -3.346 | 2.044 | 1.734 | 2.644 | 2.334 |
| 29 | [UO <sub>2</sub> -(DMF) <sub>5</sub> ] <sup>2+/-</sup>                       | 0.889 | -4.336 | 1.054 | 0.744 | 1.654 | 1.344 |
| 30 | [UO <sub>2</sub> -(trop) <sub>2</sub> -DMF] <sup>0/1-</sup>                  | 1.456 | -3.737 | 1.653 | 1.343 | 2.253 | 1.943 |
| 31 | [UO <sub>2</sub> -sap-(DMF) <sub>2</sub> ] <sup>0/1-</sup>                   | 1.585 | -3.393 | 1.997 | 1.687 | 2.597 | 2.287 |
| 32 | [UO <sub>2</sub> -(dbm) <sub>2</sub> -DMF] <sup>0/1-</sup>                   | 1.461 | -3.538 | 1.852 | 1.542 | 2.452 | 2.142 |
| 33 | [UO <sub>2</sub> -(btfacac) <sub>2</sub> -DMF] <sup>0/1-</sup>               | 1.183 | -3.935 | 1.455 | 1.145 | 2.055 | 1.745 |
| 34 | [UO <sub>2</sub> -(ttfacac) <sub>2</sub> -DMF] <sup>0/1-</sup>               | 1.176 | -3.976 | 1.414 | 1.104 | 2.014 | 1.704 |
| 35 | [UO <sub>2</sub> -(fod) <sub>2</sub> -DMF] <sup>0/1-</sup>                   | 1.210 | -3.828 | 1.562 | 1.252 | 2.162 | 1.852 |
| 36 | [UO <sub>2</sub> -salbiby-DMF] <sup>0/1-</sup>                               | 1.620 | -3.264 | 2.126 | 1.816 | 2.726 | 2.416 |
|    | <b>DCM</b>                                                                   |       |        |       |       |       |       |
| 37 | [UO <sub>2</sub> (L1)-(acac)] <sup>0/1-</sup>                                | 1.820 | -3.380 | 2.111 | 1.801 | 2.711 | 2.401 |
| 38 | [UO <sub>2</sub> (L1)-(dbm)] <sup>0/1-</sup>                                 | 1.590 | -3.513 | 1.978 | 1.668 | 2.578 | 2.268 |
| 39 | [UO <sub>2</sub> (L1)-(hfacac)] <sup>0/1-</sup>                              | 1.390 | -3.760 | 1.731 | 1.421 | 2.331 | 2.021 |
| 40 | [UO <sub>2</sub> -(L2) <sub>2</sub> ] <sup>0/1-</sup>                        | 1.520 | -3.503 | 1.988 | 1.678 | 2.588 | 2.278 |
| 41 | [UO <sub>2</sub> -(L3) <sub>2</sub> ] <sup>0/1-</sup>                        | 1.350 | -3.538 | 1.953 | 1.643 | 2.553 | 2.243 |
| 42 | [UO <sub>2</sub> -(L4+M)] <sup>+0</sup>                                      | 1.450 | -3.818 | 1.673 | 1.363 | 2.273 | 1.963 |
| 43 | [UO <sub>2</sub> -(L5) <sub>2</sub> ] <sup>0/1-</sup>                        | 1.460 | -3.621 | 1.870 | 1.560 | 2.47  | 2.16  |
| 44 | [UO <sub>2</sub> -saldien-(NEt <sub>2</sub> ) <sub>2</sub> ] <sup>0/1-</sup> | 1.430 | -3.233 | 2.258 | 1.948 | 2.858 | 2.548 |
| 45 | [UO <sub>2</sub> -sal-ph-dien] <sup>0/1-</sup>                               | 1.560 | -3.184 | 2.307 | 1.997 | 2.907 | 2.597 |
| 46 | [UO <sub>2</sub> -AP1] <sup>0/1-</sup>                                       | 1.530 | -3.122 | 2.369 | 2.059 | 2.969 | 2.659 |
| 47 | [UO <sub>2</sub> -AP2] <sup>0/1-</sup>                                       | 1.700 | -3.206 | 2.285 | 1.975 | 2.885 | 2.575 |
| 48 | [UO <sub>2</sub> -AP3] <sup>0/1-</sup>                                       | 1.640 | -3.306 | 2.185 | 1.875 | 2.785 | 2.475 |
| 49 | [UO <sub>2</sub> -salddt] <sup>0/1-</sup>                                    | 1.620 | -3.338 | 2.153 | 1.843 | 2.753 | 2.443 |
|    | <b>ACN</b>                                                                   |       |        |       |       |       |       |
| 50 | [UO <sub>2</sub> -(L4+DP)] <sup>1+0</sup>                                    | 1.140 | -3.777 | 1.462 | 1.152 | 2.062 | 1.752 |
| 51 | [UO <sub>2</sub> -tsmc-(Nyl-OH)] <sup>0/1-</sup>                             | 1.280 | -3.804 | 1.435 | 1.125 | 2.035 | 1.725 |
| 52 | [UO <sub>2</sub> -saloph1-H <sub>2</sub> O] <sup>0/1-</sup>                  | 1.360 | -3.523 | 1.716 | 1.406 | 2.316 | 2.006 |

|    |                                                                              |       |        |              |       |       |       |
|----|------------------------------------------------------------------------------|-------|--------|--------------|-------|-------|-------|
| 53 | [UO <sub>2</sub> -saloph2-H <sub>2</sub> O] <sup>0/1-</sup>                  | 1.428 | -3.641 | 1.598        | 1.288 | 2.198 | 1.888 |
| 54 | [UO <sub>2</sub> -saloph3-H <sub>2</sub> O] <sup>0/1-</sup>                  | 1.360 | -3.594 | 1.645        | 1.335 | 2.245 | 1.935 |
| 55 | [UO <sub>2</sub> -saloph4-H <sub>2</sub> O] <sup>0/1-</sup>                  | 1.505 | -3.449 | 1.790        | 1.480 | 2.39  | 2.08  |
| 56 | [UO <sub>2</sub> -saloph5-H <sub>2</sub> O] <sup>0/1-</sup>                  | 1.348 | -3.615 | 1.624        | 1.314 | 2.224 | 1.914 |
| 57 | [UO <sub>2</sub> -(CMPO + 2NO <sub>3</sub> )] <sup>0/1-</sup>                | 1.250 | -3.994 | 1.245        | 0.935 | 1.845 | 1.535 |
|    | <b>Py</b>                                                                    |       |        |              |       |       |       |
| 58 | [UO <sub>2</sub> -(Py) <sub>5</sub> ] <sup>2+/+</sup>                        | 0.910 | -4.888 | 1.399        | 1.089 | 1.999 | 1.689 |
| 59 | [UO <sub>2</sub> -salen-Py] <sup>0/1-</sup>                                  | 1.610 | -3.802 | 2.485        | 2.175 | 3.085 | 2.775 |
| 60 | [UO <sub>2</sub> -saloph-Py] <sup>0/1-</sup>                                 | 1.570 | -3.833 | 2.454        | 2.144 | 3.054 | 2.744 |
| 61 | [UO <sub>2</sub> -salan-tBu <sub>2</sub> -Py] <sup>0/1-</sup>                | 1.820 | -3.379 | 2.908        | 2.598 | 3.508 | 3.198 |
| 62 | [UO <sub>2</sub> -saloph-tBu <sub>2</sub> -Py] <sup>0/1-</sup>               | 1.670 | -3.819 | 2.468        | 2.158 | 3.068 | 2.758 |
| 63 | [UO <sub>2</sub> -saloph-tBu <sub>2</sub> -Py-K] <sup>+/0</sup>              | 1.650 | -3.853 | 2.434        | 2.124 | 3.034 | 2.724 |
| 64 | [UO <sub>2</sub> -saldien-(NEt <sub>2</sub> ) <sub>2</sub> ] <sup>0/1-</sup> | 1.780 | -3.646 | 2.641        | 2.331 | 3.241 | 2.931 |
| 65 | [UO <sub>2</sub> -salterp] <sup>0/1-</sup>                                   | 1.690 | -3.435 | 2.852        | 2.542 | 3.452 | 3.142 |
| 66 | [UO <sub>2</sub> -sal-ph-dien] <sup>0/1-</sup>                               | 1.790 | -3.493 | 2.794        | 2.484 | 3.394 | 3.084 |
| 67 | [UO <sub>2</sub> -salddt] <sup>0/1-</sup>                                    | 1.560 | -3.624 | 2.663        | 2.353 | 3.263 | 2.953 |
| 68 | [UO <sub>2</sub> -salbiby-Py] <sup>0/1-</sup>                                | 1.670 | -3.509 | 2.778        | 2.468 | 3.378 | 3.068 |
|    | MUE                                                                          | -     | -      | <b>0.406</b> | 0.239 | 0.983 | 0.673 |

**Table S7. The M06/B2(CPCM/UAKS)//B3LYP/B1 level of theory predicted RFEs of uranyl complexes.**

Spin-Orbit Coupling (SOC) = -0.31 eV; reference electrode (Fc/Fc<sup>+</sup>) correction (ref.c) = 0.285 eV

|    | Complexes                                                                    | Expt. | $\Delta G_{\text{red(s)}}^{\text{VI/V}}$ | $\Delta G_{\text{red}}$ | $\Delta G_{\text{red}} + \text{SOC}$ | $\Delta G_{\text{red}} + \text{ref.c}$ | $\Delta G_{\text{red}} + \text{SOC} + \text{ref.c}$ |
|----|------------------------------------------------------------------------------|-------|------------------------------------------|-------------------------|--------------------------------------|----------------------------------------|-----------------------------------------------------|
|    | <b>DMSO</b>                                                                  |       |                                          |                         |                                      |                                        |                                                     |
| 1  | [UO <sub>2</sub> -(DMSO) <sub>5</sub> ] <sup>2+/+</sup>                      | 0.970 | -4.830                                   | 0.664                   | 0.354                                | 0.949                                  | 0.639                                               |
| 2  | [UO <sub>2</sub> -salen-DMSO] <sup>0/1-</sup>                                | 1.602 | -3.825                                   | 1.669                   | 1.359                                | 1.954                                  | 1.644                                               |
| 3  | [UO <sub>2</sub> -saloph-DMSO] <sup>0/1-</sup>                               | 1.550 | -3.812                                   | 1.682                   | 1.372                                | 1.967                                  | 1.657                                               |
| 4  | [UO <sub>2</sub> -saldien] <sup>0/1-</sup>                                   | 1.582 | -3.882                                   | 1.612                   | 1.302                                | 1.897                                  | 1.587                                               |
| 5  | [UO <sub>2</sub> -(acac) <sub>2</sub> -DMSO] <sup>0/1-</sup>                 | 1.440 | -3.912                                   | 1.582                   | 1.272                                | 1.867                                  | 1.557                                               |
| 6  | [UO <sub>2</sub> -(trop) <sub>2</sub> -DMSO] <sup>0/1-</sup>                 | 1.379 | -4.036                                   | 1.458                   | 1.148                                | 1.743                                  | 1.433                                               |
| 7  | [UO <sub>2</sub> -sap-(DMSO) <sub>2</sub> ] <sup>0/1-</sup>                  | 1.500 | -3.840                                   | 1.654                   | 1.344                                | 1.939                                  | 1.629                                               |
| 8  | [UO <sub>2</sub> -(dbm) <sub>2</sub> -DMSO] <sup>0/1-</sup>                  | 1.360 | -3.988                                   | 1.506                   | 1.196                                | 1.791                                  | 1.481                                               |
| 9  | [UO <sub>2</sub> -(hfacac) <sub>2</sub> -DMSO] <sup>0/1-</sup>               | 0.970 | -4.607                                   | 0.887                   | 0.577                                | 1.172                                  | 0.862                                               |
| 10 | [UO <sub>2</sub> -(dpm) <sub>2</sub> -DMSO] <sup>0/1-</sup>                  | 1.520 | -3.467                                   | 2.027                   | 1.717                                | 2.312                                  | 2.002                                               |
| 11 | [UO <sub>2</sub> -(btfacac) <sub>2</sub> -DMSO] <sup>0/1-</sup>              | 1.073 | -4.275                                   | 1.219                   | 0.909                                | 1.504                                  | 1.194                                               |
| 12 | [UO <sub>2</sub> -(ttfacac) <sub>2</sub> -DMSO] <sup>0/1-</sup>              | 1.050 | -4.265                                   | 1.229                   | 0.919                                | 1.514                                  | 1.204                                               |
| 13 | [UO <sub>2</sub> -(tfacac) <sub>2</sub> -DMSO] <sup>0/1-</sup>               | 1.082 | -4.200                                   | 1.294                   | 0.984                                | 1.579                                  | 1.269                                               |
| 14 | [UO <sub>2</sub> -(tsmc)-(Nyl-OH)] <sup>0/1-</sup>                           | 1.617 | -4.120                                   | 1.374                   | 1.064                                | 1.659                                  | 1.349                                               |
| 15 | [UO <sub>2</sub> -(sldh)(AcO)-DMSO] <sup>0/1-</sup>                          | 1.717 | -4.092                                   | 1.402                   | 1.092                                | 1.687                                  | 1.377                                               |
| 16 | [UO <sub>2</sub> -salterp] <sup>0/1-</sup>                                   | 1.560 | -3.398                                   | 2.096                   | 1.786                                | 2.381                                  | 2.071                                               |
| 17 | [UO <sub>2</sub> -(salddt-NEt <sub>2</sub> )] <sup>0/1-</sup>                | 1.550 | -3.827                                   | 1.667                   | 1.357                                | 1.952                                  | 1.642                                               |
| 18 | [UO <sub>2</sub> -(salacen)-DMSO] <sup>0/1-</sup>                            | 1.140 | -4.210                                   | 1.284                   | 0.974                                | 1.569                                  | 1.259                                               |
| 19 | [UO <sub>2</sub> -appen-DMSO] <sup>0/1-</sup>                                | 1.650 | -3.693                                   | 1.801                   | 1.491                                | 2.086                                  | 1.776                                               |
| 20 | [UO <sub>2</sub> -(ac-o-ac)-DMSO] <sup>0/1-</sup>                            | 1.450 | -3.738                                   | 1.756                   | 1.446                                | 2.041                                  | 1.731                                               |
| 21 | [UO <sub>2</sub> -(ac-ph-ac)-DMSO] <sup>0/1-</sup>                           | 1.460 | -3.855                                   | 1.639                   | 1.329                                | 1.924                                  | 1.614                                               |
| 22 | [UO <sub>2</sub> -salbiby-DMSO] <sup>0/1-</sup>                              | 1.610 | -3.760                                   | 1.734                   | 1.424                                | 2.019                                  | 1.709                                               |
| 23 | [UO <sub>2</sub> -saldien-(NEt <sub>2</sub> ) <sub>2</sub> ] <sup>0/1-</sup> | 1.660 | -3.765                                   | 1.729                   | 1.419                                | 2.014                                  | 1.704                                               |
| 24 | [UO <sub>2</sub> -(sal-ph-dien)] <sup>0/1-</sup>                             | 1.630 | -3.710                                   | 1.784                   | 1.474                                | 2.069                                  | 1.759                                               |
| 25 | [UO <sub>2</sub> -(ba) <sub>2</sub> -DMSO] <sup>0/1-</sup>                   | 1.416 | -3.933                                   | 1.561                   | 1.251                                | 1.846                                  | 1.536                                               |

|    |                                                                              |       |        |       |       |       |       |
|----|------------------------------------------------------------------------------|-------|--------|-------|-------|-------|-------|
|    | <b>DMF</b>                                                                   |       |        |       |       |       |       |
| 26 | [UO <sub>2</sub> -salen-DMF] <sup>0/1-</sup>                                 | 1.672 | -3.822 | 1.956 | 1.646 | 2.241 | 1.931 |
| 27 | [UO <sub>2</sub> -saloph-DMF] <sup>0/1-</sup>                                | 1.626 | -3.834 | 1.944 | 1.634 | 2.229 | 1.919 |
| 28 | [UO <sub>2</sub> -(acac) <sub>2</sub> -DMF] <sup>0/1-</sup>                  | 1.469 | -3.773 | 2.005 | 1.695 | 2.290 | 1.980 |
| 29 | [UO <sub>2</sub> -(DMF) <sub>5</sub> ] <sup>2+/-</sup>                       | 0.889 | -4.807 | 0.971 | 0.661 | 1.256 | 0.946 |
| 30 | [UO <sub>2</sub> -(trop) <sub>2</sub> -DMF] <sup>0/1-</sup>                  | 1.456 | -4.072 | 1.706 | 1.396 | 1.991 | 1.681 |
| 31 | [UO <sub>2</sub> -sap-(DMF) <sub>2</sub> ] <sup>0/1-</sup>                   | 1.585 | -3.773 | 2.005 | 1.695 | 2.290 | 1.980 |
| 32 | [UO <sub>2</sub> -(dbm) <sub>2</sub> -DMF] <sup>0/1-</sup>                   | 1.461 | -3.929 | 1.849 | 1.539 | 2.134 | 1.824 |
| 33 | [UO <sub>2</sub> -(btfacac) <sub>2</sub> -DMF] <sup>0/1-</sup>               | 1.183 | -4.201 | 1.577 | 1.267 | 1.862 | 1.552 |
| 34 | [UO <sub>2</sub> -(ttfacac) <sub>2</sub> -DMF] <sup>0/1-</sup>               | 1.176 | -4.236 | 1.542 | 1.232 | 1.827 | 1.517 |
| 35 | [UO <sub>2</sub> -(fod) <sub>2</sub> -DMF] <sup>0/1-</sup>                   | 1.210 | -4.107 | 1.671 | 1.361 | 1.956 | 1.646 |
| 36 | [UO <sub>2</sub> -salbiby-DMF] <sup>0/1-</sup>                               | 1.620 | -3.518 | 2.260 | 1.950 | 2.545 | 2.235 |
|    | <b>DCM</b>                                                                   |       |        |       |       |       |       |
| 37 | [UO <sub>2</sub> (L1)-(acac)] <sup>0/1-</sup>                                | 1.820 | -3.510 | 2.153 | 1.843 | 2.438 | 2.128 |
| 38 | [UO <sub>2</sub> (L1)-(dbm)] <sup>0/1-</sup>                                 | 1.590 | -3.637 | 2.026 | 1.716 | 2.311 | 2.001 |
| 39 | [UO <sub>2</sub> (L1)-(hfacac)] <sup>0/1-</sup>                              | 1.390 | -3.802 | 1.861 | 1.551 | 2.146 | 1.836 |
| 40 | [UO <sub>2</sub> -(L2) <sub>2</sub> ] <sup>0/1-</sup>                        | 1.520 | -3.713 | 1.950 | 1.640 | 2.235 | 1.925 |
| 41 | [UO <sub>2</sub> -(L3) <sub>2</sub> ] <sup>0/1-</sup>                        | 1.350 | -3.764 | 1.899 | 1.589 | 2.184 | 1.874 |
| 42 | [UO <sub>2</sub> -(L4+M)] <sup>+0</sup>                                      | 1.450 | -4.118 | 1.545 | 1.235 | 1.830 | 1.520 |
| 43 | [UO <sub>2</sub> -(L5) <sub>2</sub> ] <sup>0/1-</sup>                        | 1.460 | -3.906 | 1.757 | 1.447 | 2.042 | 1.732 |
| 44 | [UO <sub>2</sub> -saldien-(NEt <sub>2</sub> ) <sub>2</sub> ] <sup>0/1-</sup> | 1.430 | -3.589 | 2.074 | 1.764 | 2.359 | 2.049 |
| 45 | [UO <sub>2</sub> -sal-ph-dien] <sup>0/1-</sup>                               | 1.560 | -3.482 | 2.181 | 1.871 | 2.466 | 2.156 |
| 46 | [UO <sub>2</sub> -AP1] <sup>0/1-</sup>                                       | 1.530 | -3.156 | 2.507 | 2.197 | 2.792 | 2.482 |
| 47 | [UO <sub>2</sub> -AP2] <sup>0/1-</sup>                                       | 1.700 | -3.414 | 2.249 | 1.939 | 2.534 | 2.224 |
| 48 | [UO <sub>2</sub> -AP3] <sup>0/1-</sup>                                       | 1.640 | -3.638 | 2.025 | 1.715 | 2.310 | 2.000 |
| 49 | [UO <sub>2</sub> -saldtt] <sup>0/1-</sup>                                    | 1.620 | -3.698 | 1.965 | 1.655 | 2.250 | 1.940 |
|    | <b>ACN</b>                                                                   |       |        |       |       |       |       |
| 50 | [UO <sub>2</sub> -(L4+DP)] <sup>1+0</sup>                                    | 1.140 | -4.035 | 1.211 | 0.901 | 1.496 | 1.186 |
| 51 | [UO <sub>2</sub> -tsmc-(Nyl-OH)] <sup>0/1-</sup>                             | 1.280 | -4.127 | 1.119 | 0.809 | 1.404 | 1.094 |
| 52 | [UO <sub>2</sub> -saloph1-H <sub>2</sub> O] <sup>0/1-</sup>                  | 1.360 | -3.926 | 1.320 | 1.010 | 1.605 | 1.295 |
| 53 | [UO <sub>2</sub> -saloph2-H <sub>2</sub> O] <sup>0/1-</sup>                  | 1.428 | -3.953 | 1.293 | 0.983 | 1.578 | 1.268 |

|    |                                                                              |       |        |       |       |       |       |
|----|------------------------------------------------------------------------------|-------|--------|-------|-------|-------|-------|
| 54 | [UO <sub>2</sub> -saloph3-H <sub>2</sub> O] <sup>0/1-</sup>                  | 1.360 | -3.873 | 1.373 | 1.063 | 1.658 | 1.348 |
| 55 | [UO <sub>2</sub> -saloph4-H <sub>2</sub> O] <sup>0/1-</sup>                  | 1.505 | -3.743 | 1.503 | 1.193 | 1.788 | 1.478 |
| 56 | [UO <sub>2</sub> -saloph5-H <sub>2</sub> O] <sup>0/1-</sup>                  | 1.348 | -3.954 | 1.292 | 0.982 | 1.577 | 1.267 |
| 57 | [UO <sub>2</sub> -(CMPO + 2NO <sub>3</sub> )] <sup>0/1-</sup>                | 1.250 | -4.182 | 1.064 | 0.754 | 1.349 | 1.039 |
|    | <b>Py</b>                                                                    |       |        |       |       |       |       |
| 58 | [UO <sub>2</sub> -(Py) <sub>5</sub> ] <sup>2+/+</sup>                        | 0.910 | -5.157 | 1.383 | 1.073 | 1.668 | 1.358 |
| 59 | [UO <sub>2</sub> -salen-Py] <sup>0/1-</sup>                                  | 1.610 | -4.168 | 2.372 | 2.062 | 2.657 | 2.347 |
| 60 | [UO <sub>2</sub> -saloph-Py] <sup>0/1-</sup>                                 | 1.570 | -4.234 | 2.306 | 1.996 | 2.591 | 2.281 |
| 61 | [UO <sub>2</sub> -salan-tBu <sub>2</sub> -Py] <sup>0/1-</sup>                | 1.820 | -3.810 | 2.730 | 2.420 | 3.015 | 2.705 |
| 62 | [UO <sub>2</sub> -saloph-tBu <sub>2</sub> -Py] <sup>0/1-</sup>               | 1.670 | -4.186 | 2.354 | 2.044 | 2.639 | 2.329 |
| 63 | [UO <sub>2</sub> -saloph-tBu <sub>2</sub> -Py-K] <sup>+0</sup>               | 1.650 | -4.272 | 2.268 | 1.958 | 2.553 | 2.243 |
| 64 | [UO <sub>2</sub> -saldien-(NEt <sub>2</sub> ) <sub>2</sub> ] <sup>0/1-</sup> | 1.780 | -4.000 | 2.540 | 2.230 | 2.825 | 2.515 |
| 65 | [UO <sub>2</sub> -salterp] <sup>0/1-</sup>                                   | 1.690 | -3.214 | 3.326 | 3.016 | 3.611 | 3.301 |
| 66 | [UO <sub>2</sub> -sal-ph-dien] <sup>0/1-</sup>                               | 1.790 | -3.764 | 2.776 | 2.466 | 3.061 | 2.751 |
| 67 | [UO <sub>2</sub> -salddt] <sup>0/1-</sup>                                    | 1.560 | -3.918 | 2.622 | 2.312 | 2.907 | 2.597 |
| 68 | [UO <sub>2</sub> -salbiby-Py] <sup>0/1-</sup>                                | 1.670 | -3.785 | 2.755 | 2.445 | 3.040 | 2.730 |
|    | MUE                                                                          | -     | -      | 0.372 | 0.280 | 0.614 | 0.355 |

## References

1. W. Kuchle, M. Dolg, H. Stoll, and H. Preuss, *J. Chem. Phys.*, 1994, **100**, 7535–7542.
2. X. Cao, M. Dolg, and H. Stoll, *J. Chem. Phys.*, 2003, **118**, 487–496.
3. X. Cao and M. Dolg, *J. Mol. Struct. THEOCHEM*, 2004, **673**, 203–209.
4. A. D. Becke, *Phys. Rev. A*, 1988, **38**, 3098–3100.
5. A. D. Becke, *J. Chem. Phys.*, 1993, **98**, 5648–5652.
6. A. D. Becke, *J. Chem. Phys.*, 1993, **98**, 1372–1377.



7. C. Lee, W. Yang, and R. G. Parr, *Phys. Rev. B*, 1988, **37**, 785–789.
8. Y. Zhao and D. G. Truhlar, *Theor. Chem. Acc.*, 2007, **120**, 215–241.
9. V. Barone and M. Cossi, *J. Phys. Chem. A*, 1998, **102**, 1995–2001.
10. M. Cossi, N. Rega, G. Scalmani, and V. Barone, *J. Comput. Chem.*, 2003, **24**, 669–681.
11. Y. Takano, K. N. Houk, and L. Angeles, *J. Chem. TheoryComput.*, 2005, **1**, 70–77.
12. K. Arumugam, University of Manchester, 2012.
13. K. Arumugam and U. Becker, *Minerals*, 2014, **4**, 345–387.
14. P. J. Hay, R. L. Martin, and G. Schreckenbach, *J. Phys. Chem. A*, 2000, **104**, 6259–6270.
15. M. J. Frisch, G. W. Trucks, H. B. Schlegel, G. E. Scuseria, M. A. Robb, J. R. Cheeseman, J. A. M. Jr., T. Vreven, K. N. Kudin, J. C. Burant, J. M. Millam, S. S. Iyengar, J. Tomasi, V. Barone, B. Mennucci, M. Cossi, G. Scalmani, G. A. P. N. Rega, H. Nakatsuji, M. Hada, M. Ehara, K. Toyota, R. Fukuda, J. Hasegawa, M. Ishida, T. Nakajima, Y. Honda, O. Kitao, H. Nakai, M. Klene, X. Li, J. E. Knox, H. P. Hratchian, J. B. Cross, V. Bakken, C. Adamo, J. Jaramillo, R. Gomperts, R. E. Stratmann, O. Yazyev, A. J. Austin, R. Cammi, C. Pomelli, J. W. Ochterski, P. Y. Ayala, K. Morokuma, G. A. Voth, P. Salvador, J. J. Dannenberg, V. G. Zakrzewski, S. Dapprich, A. D. Daniels, M. C. Strain, O. Farkas, D. K. Malick, A. D. Rabuck, K. Raghavachari, J. B. Foresman, J. V. Ortiz, Q. Cui, A. G. Baboul, S. Clifford, J. Cioslowski, B. B. Stefanov, G. Liu, A. Liashenko, P. Piskorz, I. Komaromi, R. L. Martin, D. J. Fox, T. Keith, M. A. Al-Laham, C. Y. Peng, A. Nanayakkara, M. Challacombe, P. M. W. Gill, B. Johnson, W. Chen, M. W. Wong, C. Gonzalez, and J. A. Pople, 2003.
16. Gaussian09, Revision, B.01, M. J. Frisch, G. W. Trucks, H. B. Schlegel, G. E. Scuseria, M. A. Robb, J. R. Cheeseman, G. Scalmani, V. Barone, B. Mennucci, G. A. Petersson, H. Nakatsuji, M. Caricato, X. Li, H. P. Hratchian, A. F. Izmaylov, J. Bloino, G. Zheng, J. L. Sonnenberg, M. Hada, M. Ehara, K. Toyota, R. Fukuda, J. Hasegawa, M. Ishida, T. Nakajima, Y. Honda, O. Kitao, H. Nakai, T. Vreven, J. A. Montgomery, Jr., J. E. Peralta, F. Ogliaro, M. Bearpark, J. J. Heyd, E. Brothers, K. N. Kudin, V. N. Staroverov, R. Kobayashi, J. Normand, K. Raghavachari, A. Rendell, J. C. Burant, S. S. Iyengar, J. Tomasi, M. Cossi, N. Rega, J. M. Millam, M. Klene, J. E. Knox, J. B. Cross, V. Bakken, C. Adamo, J. Jaramillo, R. Gomperts, R. E. Stratmann, O. Yazyev, A. J. Austin, R. Cammi, C. Pomelli, J. W. Ochterski, R. L. Martin, K. Morokuma, V. G. Zakrzewski, G. A. Voth, P. Salvador, J. J. Dannenberg, S. Dapprich, A. D. Daniels, Ö. Farkas, J. B. Foresman, J. V. Ortiz, J. Cioslowski, and D. J. Fox, *Gaussian, Inc., Wallingford CT*, 2010.
17. G. Schaftenaar and J. H. Noordik, *J. Comput. Aided. Mol. Des.*, 2000, **14**, 123–134.

18. R. L. D.A. Case, T.A. Darden, T.E. Cheatham, III, C.L. Simmerling, J. Wang, R.E. Duke, I. M. Crowley, R.C. Walker, W. Zhang, K.M. Merz, B. Wang, S. Hayik, A. Roitberg, G. Seabra, H. G. Kolossváry, K.F. Wong, F. Paesani, J. Vanicek, X. Wu, S.R. Brozell, T. Steinbrecher, V. B. L. Yang, C. Tan, J. Mongan, V. Hornak, G. Cui, D.H. Mathews, M.G. Seetin, C. Sagui, and P. A. Kollman, 2008.
19. P. Guilbaud and G. Wipff, *J. Mol. Struct. THEOCHEM*, 1996, **366**, 55–63.
20. T. Fox and P. A. Kollman, *J. Phys. Chem. B*, 1998, **102**, 8070–8079.
21. R. A. Bryce, <http://www.pharmacy.manchester.ac.uk/bryce/amber/>.
22. G. Gritzner and J. Kuta, *Pure Appl. Chem.*, 1982, **54**, 1527–1532.
23. L. E. Fernandez, S. Horvath, and S. Hammes-Schiffer, *J. Phys. Chem. C*, 2012, **116**, 3171–3180.
24. X. J. Qi, Y. Fu, L. Liu, and Q. X. Guo, *Organometallics*, 2007, **26**, 4197–4203.
25. S. Kim, T. Asakura, Y. Morita, G. Uchiyama, and Y. Ikeda, *Radiochim. Acta*, 2005, **93**, 75–81.
26. K. Mizuoka and Y. Ikeda, *Inorg. Chem.*, 2003, **42**, 3396–3398.
27. K. Takao, M. Kato, S. Takao, A. Nagasawa, G. Bernhard, C. Hennig, and Y. Ikeda, *Inorg. Chem.*, 2010, **49**, 2349–2359.
28. K. Mizuguchi, S.-H. Lee, Y. Ikeda, and H. Tomiyasu, *J. Alloys Compd.*, 1998, **271–273**, 163–167.
29. T. Yamamura, Y. Shiokawa, H. Yamana, and H. Moriyama, *Electrochim. Acta*, 2002, **48**, 43–50.
30. M. Sahin, A. Koca, N. Ozdemir, M. Dinçer, O. Büyükgüngör, T. Bal-Demirci, and B. Ulküseven, *Dalt. Trans.*, 2010, **39**, 10228–10237.
31. S. Marouani, A. Hachemi, A. Addala, N. A. Yacouta, F. Benghanem, J. P. Guisselbrecht, and M. Gross, *J. Eng. Appl. Sci.*, 2007, **2**, 833–839.
32. D. Royal, *PhD Thesis., Univ. Manchester, Manchester, United Kingdom.*, 2011.
33. P. Zanello, S. Tamburini, P. A. Vigato, and G. A. Mazzocchin, *Transit. Met. Chem.*, 1984, **9**, 176–180.
34. T. Yamamura, K. Shirasaki, H. Sato, and Y. Nakamura, *J. Phys. Chem. C*, 2007, **111**, 18812–18820.

35. S. Y. Kim, T. Asakura, Y. Morita, and Y. Ikeda, *J. Alloys Compd.*, 2006, **408–412**, 1291–1295.
36. S. Y. Kim, H. Tomiyasu, and Y. Ikeda, *J. Nucl. Sci. Technol.*, 2002, **39**, 160–165.
37. T. W. Hayton and G. Wu, *Inorg. Chem.*, 2008, **47**, 7415–7423.
38. T. W. Hayton and G. Wu, *Inorg. Chem.*, 2009, **48**, 3065–3072.
39. T. W. Hayton and G. Wu, *J. Am. Chem. Soc.*, 2008, **130**, 2005–2014.
40. J. L. Brown, C. C. Mokhtarzadeh, J. M. Lever, G. Wu, and T. W. Hayton, *Inorg. Chem.*, 2011, **50**, 5105–5112.
41. J. L. Sessler, A. E. V. Gordon, D. Seidel, S. Hannah, V. Lynch, P. L. Gordon, R. J. Donohoe, C. D. Tait, and D. W. Keogh, *Inorganica Chim. Acta*, 2002, **341**, 54–70.
42. Arie R. Van Doorn, M. Bos, S. Harkema, J. Van Eerden, W. Verboom, and D. N. Reinhoudt, *J. Org. Chem.*, 1991, **56**, 2371–2380.
43. S. Y. Kim, K. Hatakeyama, H. Tomiyasu, and Y. Ikeda, *J. Nucl. Sci. Technol.*, 1998, **35**, 437–442.
44. G. Nocton, P. Horeglad, V. Vetere, J. Pécaut, L. Dubois., P. Maldivi, N. M. Edelstein, and M. Mazzanti, *J. Am. Chem. Soc.*, 2010, **132**, 495–508.
